# Supplementary material for: Discovery of N,4-Di(1H-pyrazol-4-yl)pyrimidin-2-amine-Derived CDK2 Inhibitors as Potential Anticancer Agents: Design, Synthesis, and Evaluation
Source: MDPI journal article supplement (doi:10.3390/molecules28072951), 2023-03-25
Supplement: s1 [file s1]

## Supplementary Data

### **Discovery of *N*,4-Di(1*H*-pyrazol-4-yl)pyrimidin-2-amine-Derived CDK2 Inhibitors as Potential Anticancer Agents: Design, Synthesis & Evaluation**

Biruk Sintayehu Fanta, Jimma Lenjisa, Theodosia Teo, Lianmeng Kou, Laychiluh Mekonnen, Yuchao Yang, Sunita KC Basnet, Ramin Hassankhani, Matthew J. Sykes, Mingfeng Yu\* and Shudong Wang\*

Drug Discovery and Development, Clinical and Health Sciences, University of South Australia, Adelaide, South Australia 5000, Australia.

\*Corresponding authors. E-mail: [Mingfeng.Yu@unisa.edu.au](mailto:Mingfeng.Yu@unisa.edu.au); [Shudong.Wang@unisa.edu.au](mailto:Shudong.Wang@unisa.edu.au)

#### **Content**

**Figures S1-S65.** <sup>1</sup>H & <sup>13</sup>C NMR spectra, HRMS & HPLC chromatograms of **14-21**, **23**, **25**, **31**, **32** and **35**.

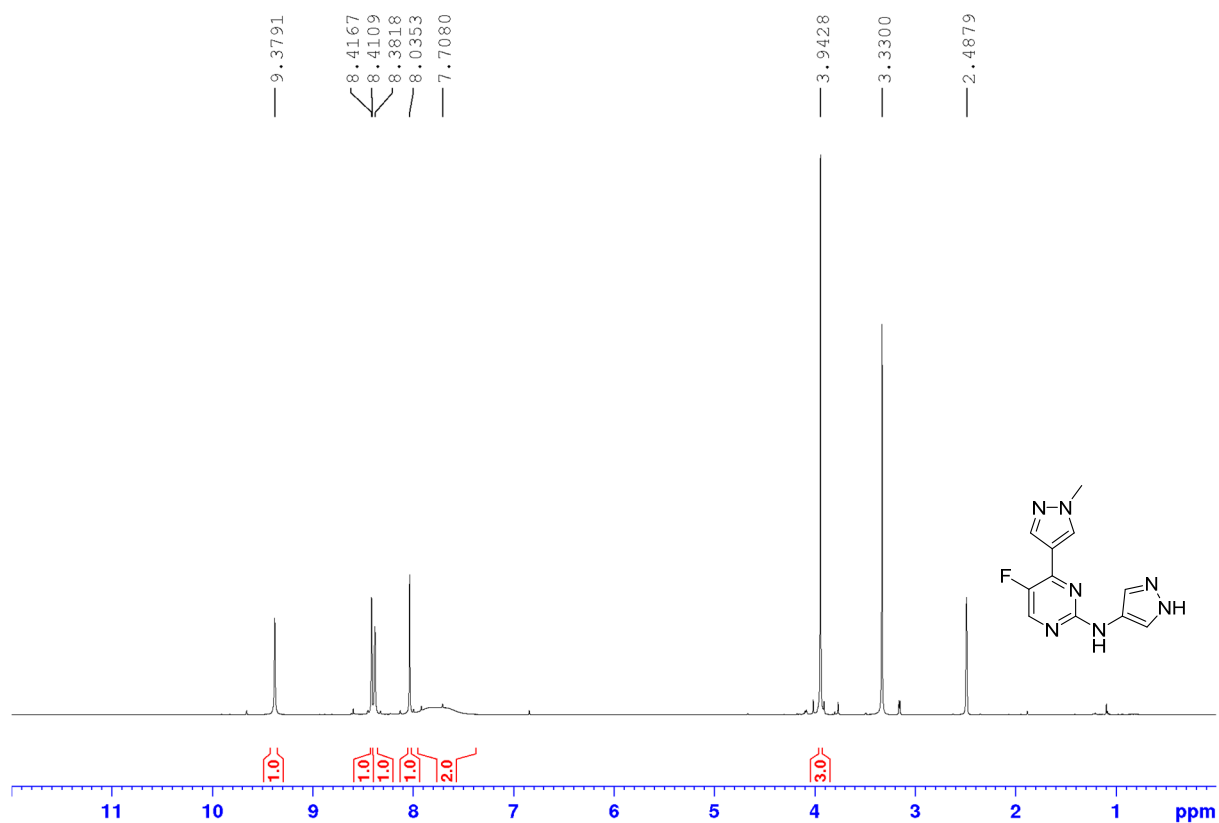

Figure S1. <sup>1</sup>H NMR spectrum of **14** in DMSO-*d*<sub>6</sub> (500 MHz).

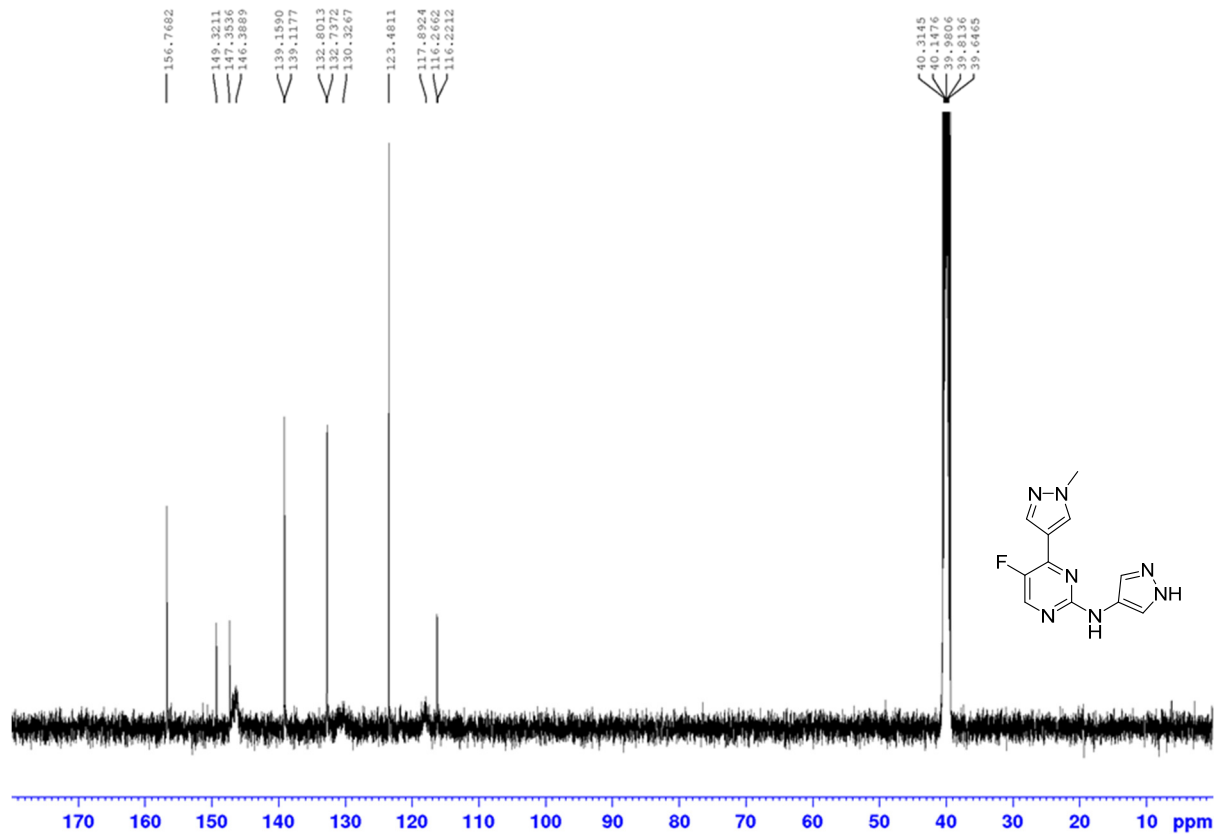

Figure S2. <sup>13</sup>C NMR spectrum of **14** in DMSO-*d*<sub>6</sub> (125 MHz).

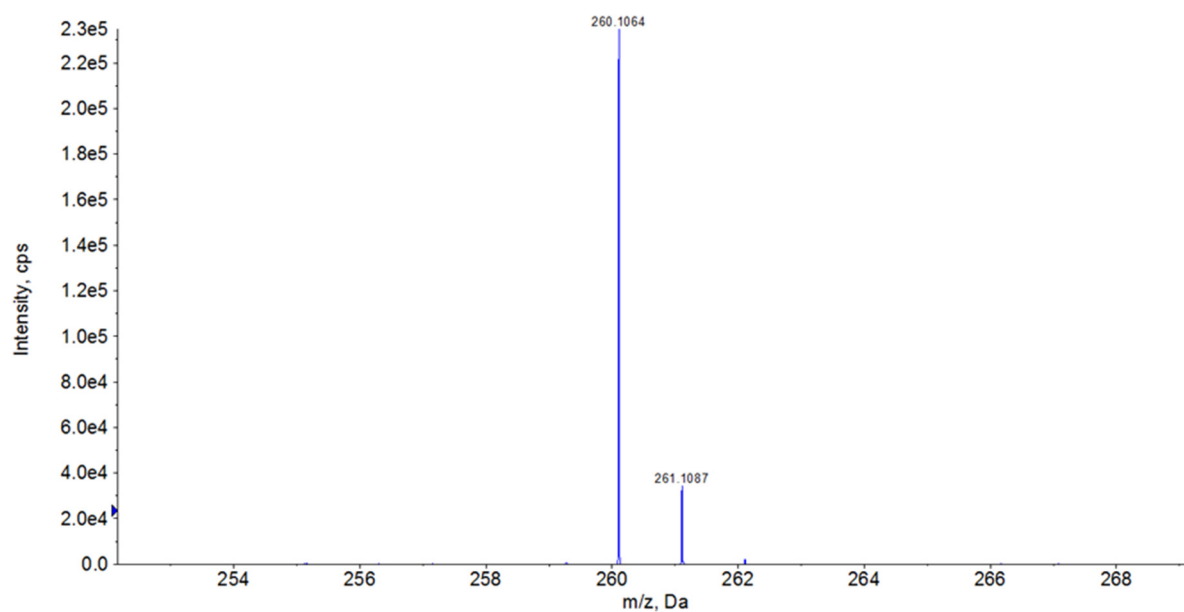

Figure S3. HRMS of 14.

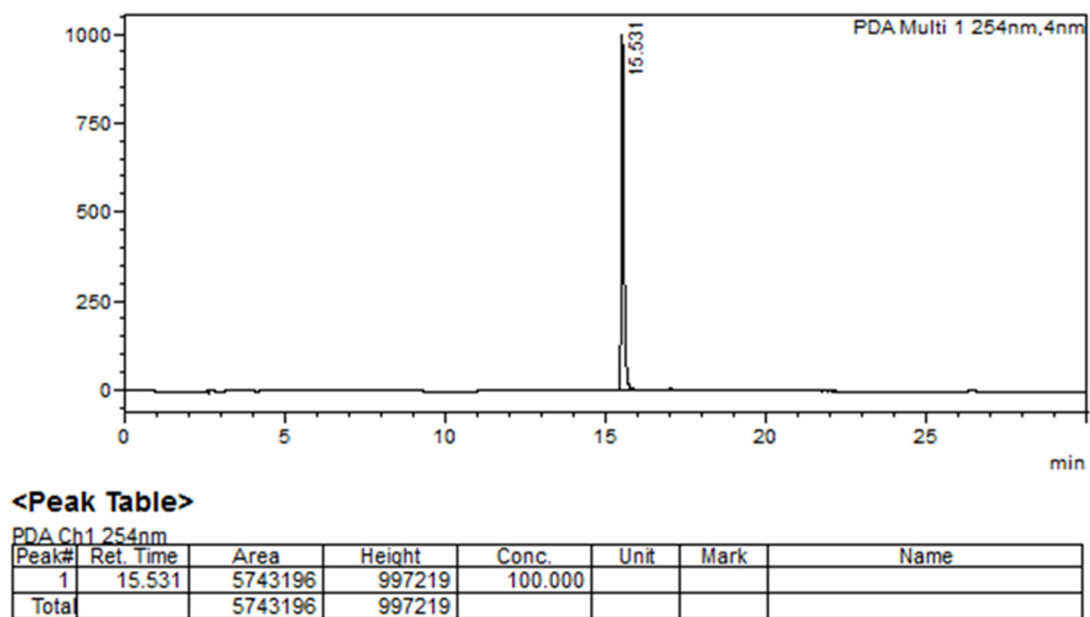

Figure S4. HPLC chromatogram of 14 determined by method A.

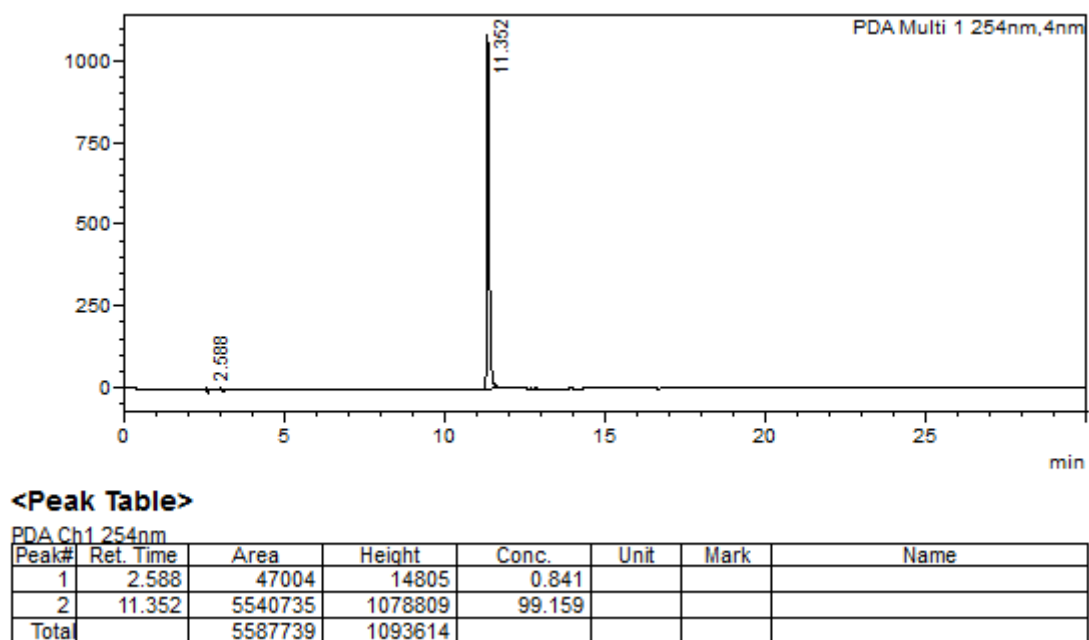

Figure S5. HPLC chromatogram of **14** determined by method B.

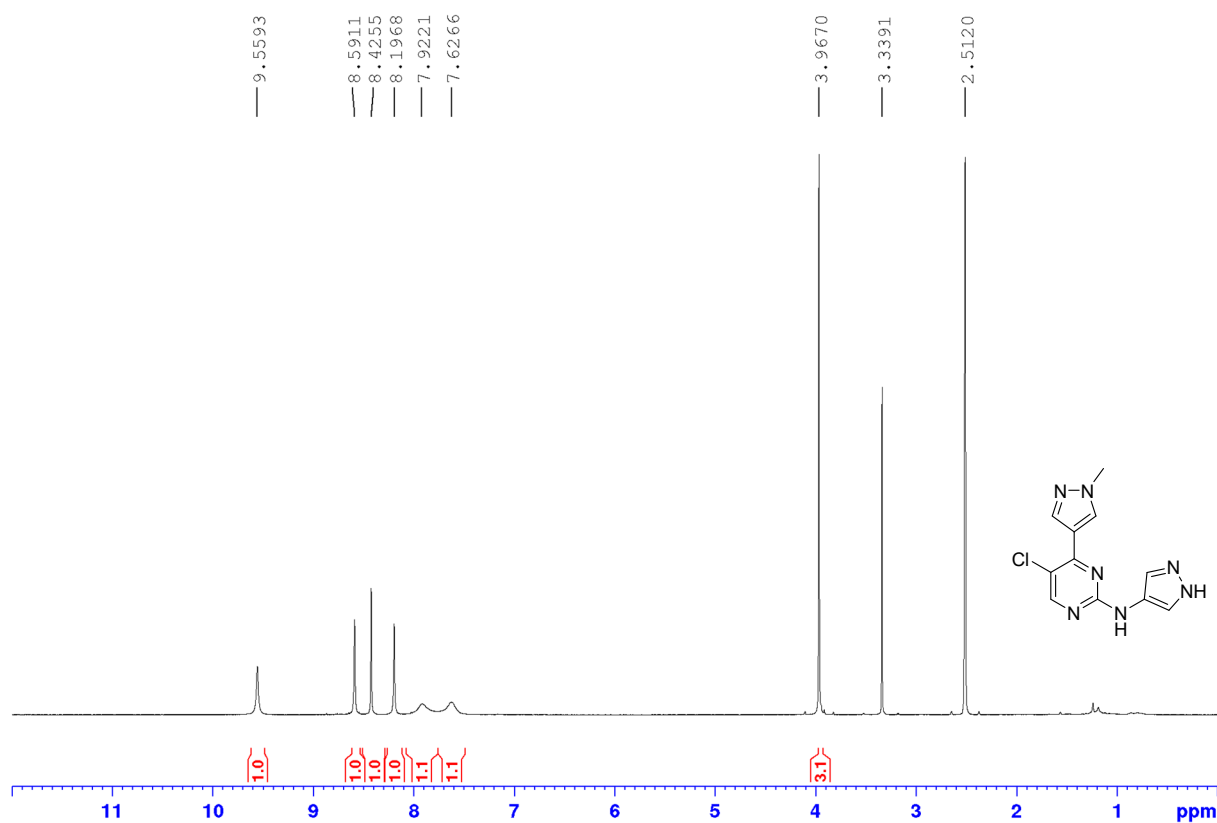

Figure S6.  $^1\text{H}$  NMR spectrum of **15** in  $\text{DMSO}-d_6$  (500 MHz).

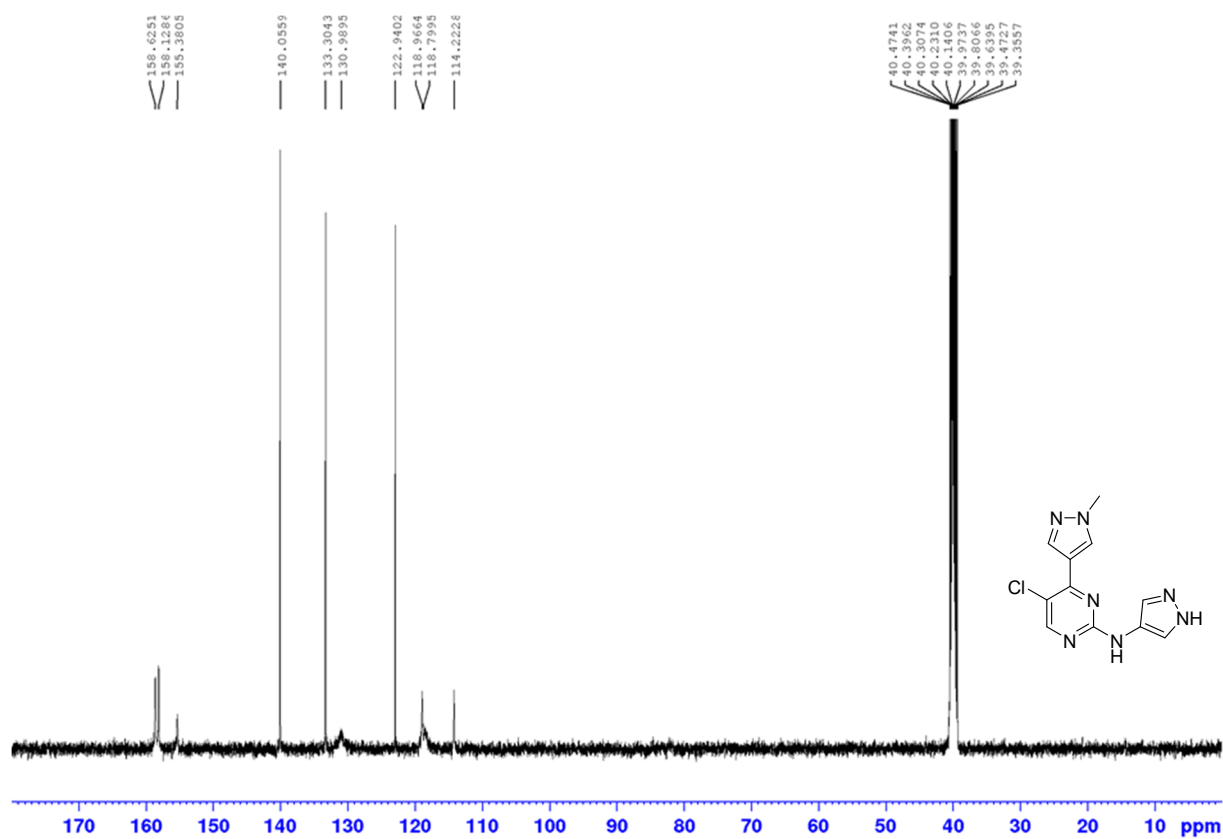

Figure S7. <sup>13</sup>C NMR spectrum of 15 in DMSO-*d*<sub>6</sub> (125 MHz).

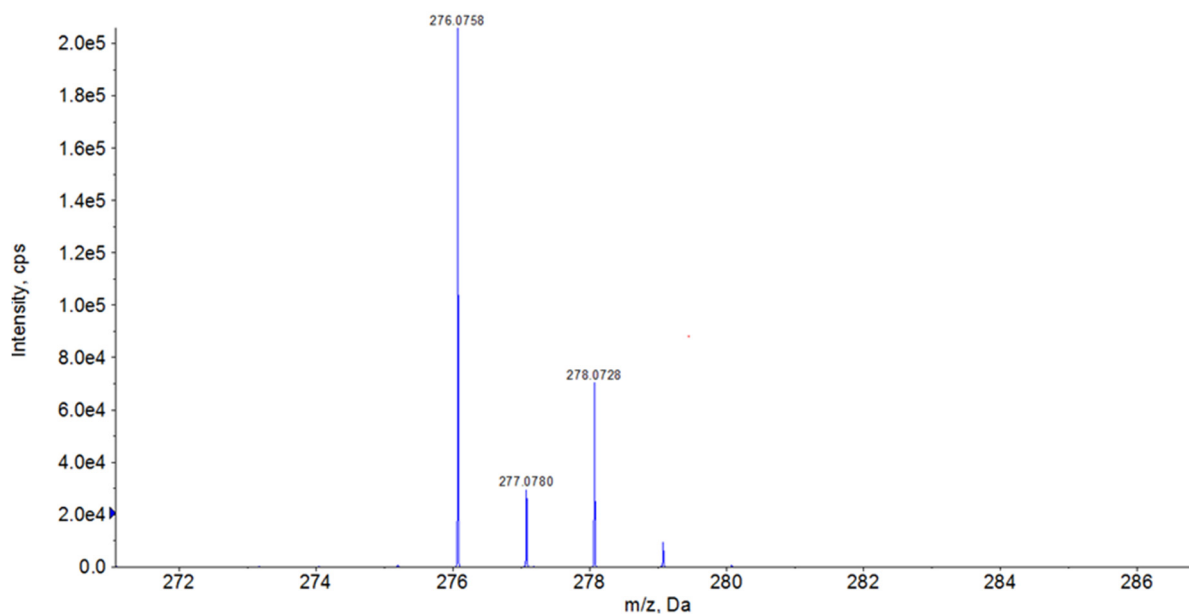

Figure S8. HRMS of 15.

# <Chromatogram>

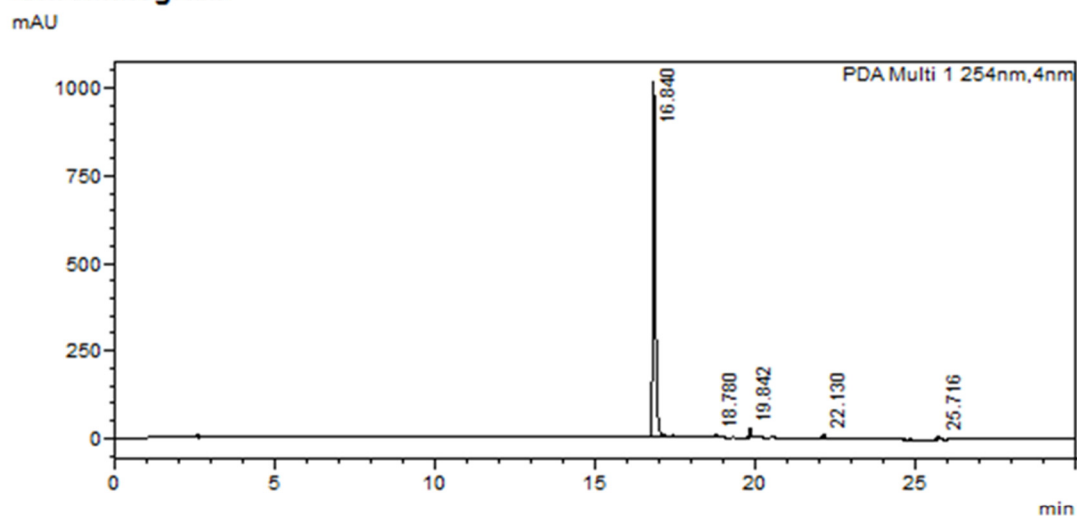

## <Peak Table>

| PDA Ch1 254nm |           |         |         |        |      |      |      |
|---------------|-----------|---------|---------|--------|------|------|------|
| Peak#         | Ret. Time | Area    | Height  | Conc.  | Unit | Mark | Name |
| 1             | 16.840    | 5781709 | 1012524 | 95.582 |      |      |      |
| 2             | 18.780    | 55656   | 10458   | 0.920  |      |      |      |
| 3             | 19.842    | 123205  | 24487   | 2.037  |      |      |      |
| 4             | 22.130    | 54164   | 11585   | 0.895  |      |      |      |
| 5             | 25.716    | 34230   | 7150    | 0.566  |      |      |      |
| Total         |           | 6048964 | 1066205 |        |      |      |      |

Figure S9. HPLC chromatogram of 15 determined by method A.

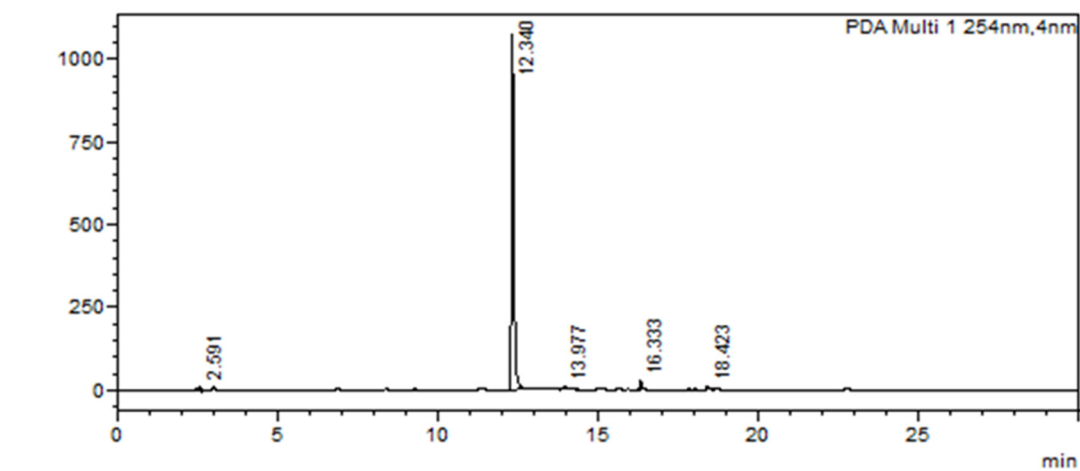

## <Peak Table>

| PDA Ch1 254nm |           |         |         |        |      |      |      |
|---------------|-----------|---------|---------|--------|------|------|------|
| Peak#         | Ret. Time | Area    | Height  | Conc.  | Unit | Mark | Name |
| 1             | 2.591     | 43150   | 15123   | 0.741  |      |      |      |
| 2             | 12.340    | 5563012 | 1069367 | 95.547 |      |      |      |
| 3             | 13.977    | 55892   | 10403   | 0.960  |      |      |      |
| 4             | 16.333    | 114395  | 25665   | 1.965  |      |      |      |
| 5             | 18.423    | 45799   | 8813    | 0.787  |      |      |      |
| Total         |           | 5822248 | 1129370 |        |      |      |      |

Figure S10. HPLC chromatogram of 15 determined by method B.

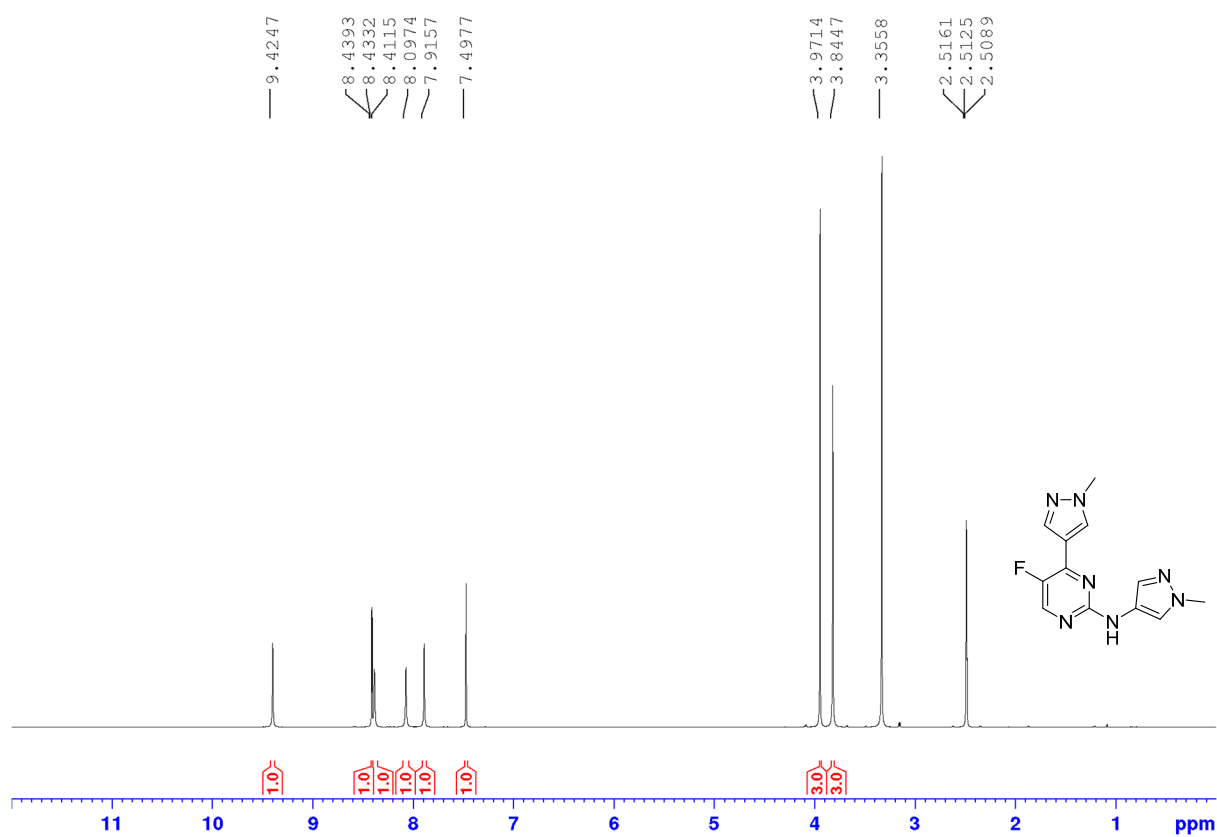

**Figure S11.** <sup>1</sup>H NMR spectrum of **16** in DMSO-*d*<sub>6</sub> (500 MHz).

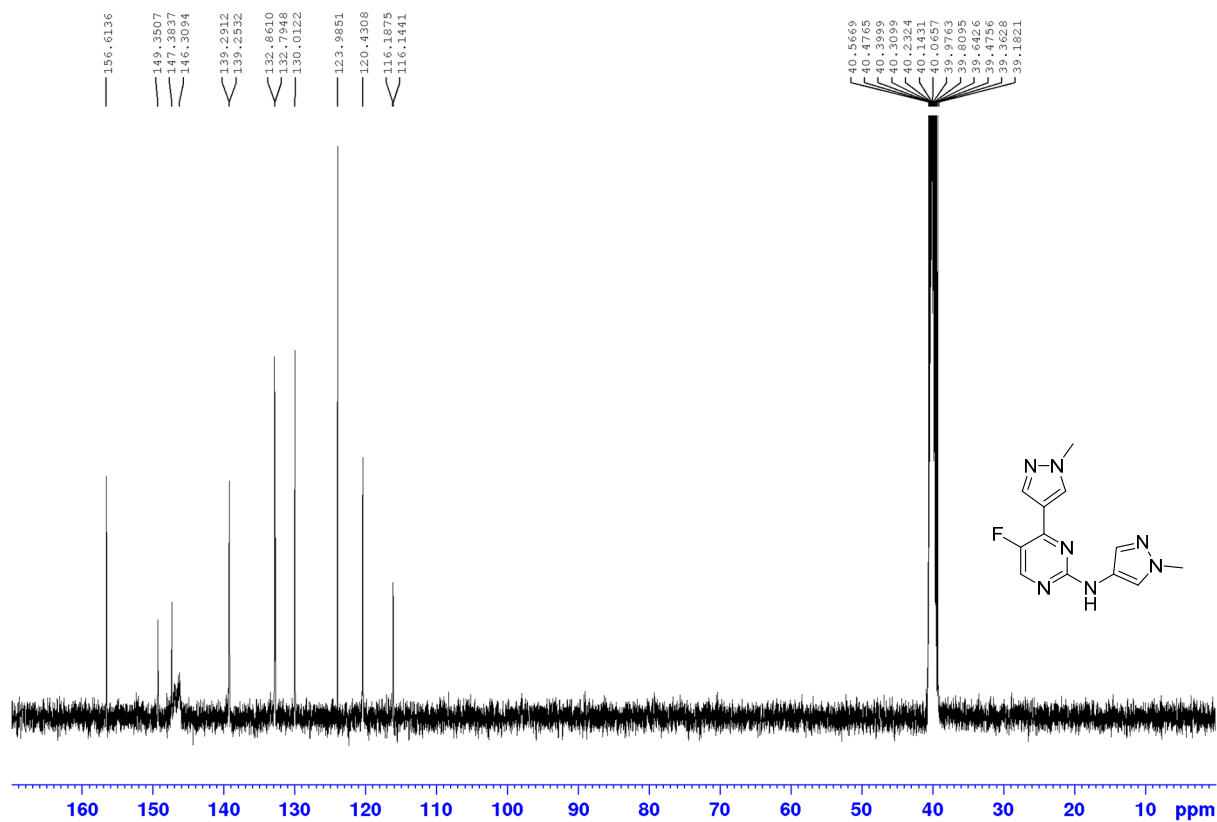

**Figure S12.** <sup>13</sup>C NMR spectrum of **16** in DMSO-*d*<sub>6</sub> (125 MHz).

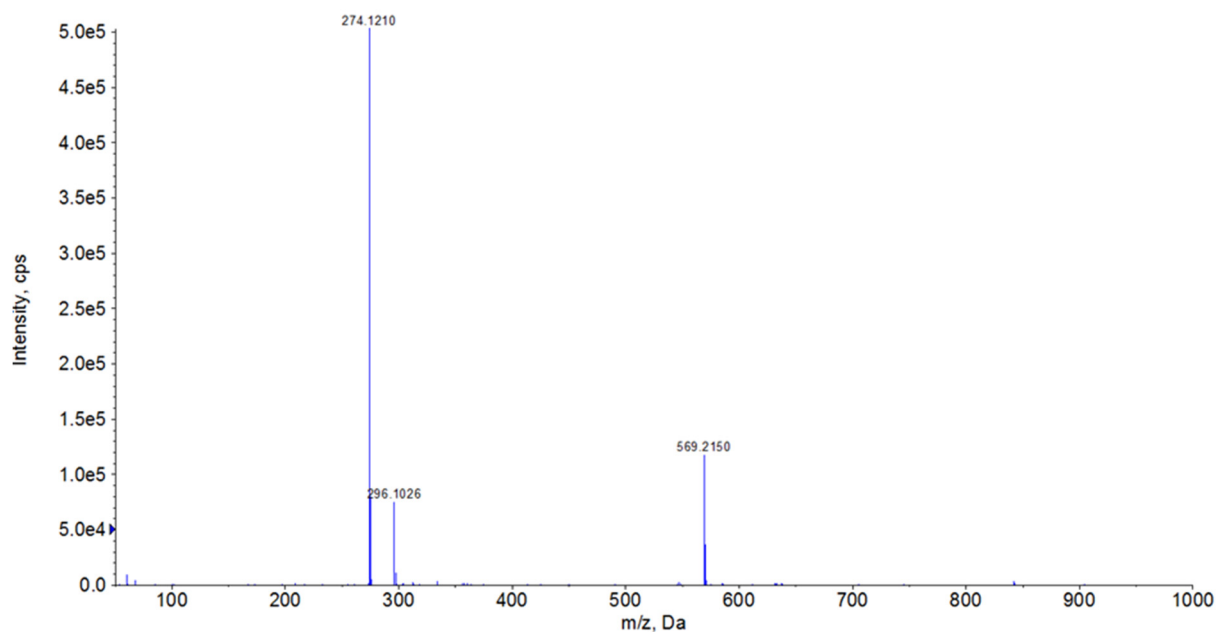

Figure S13. HRMS of 16.

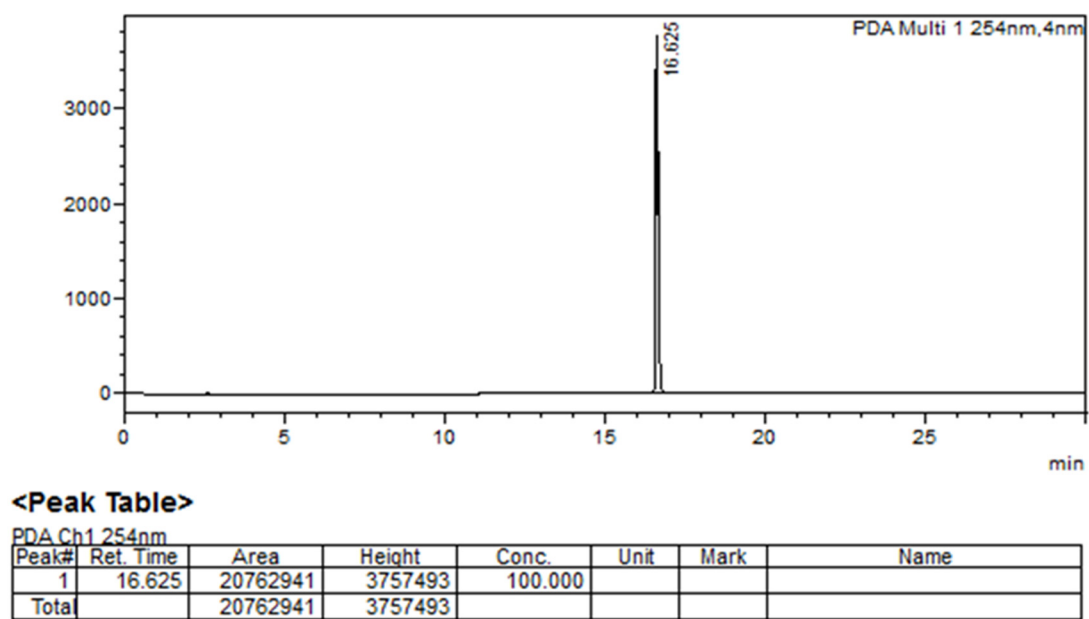

Figure S14. HPLC chromatogram of 16 determined by method A.

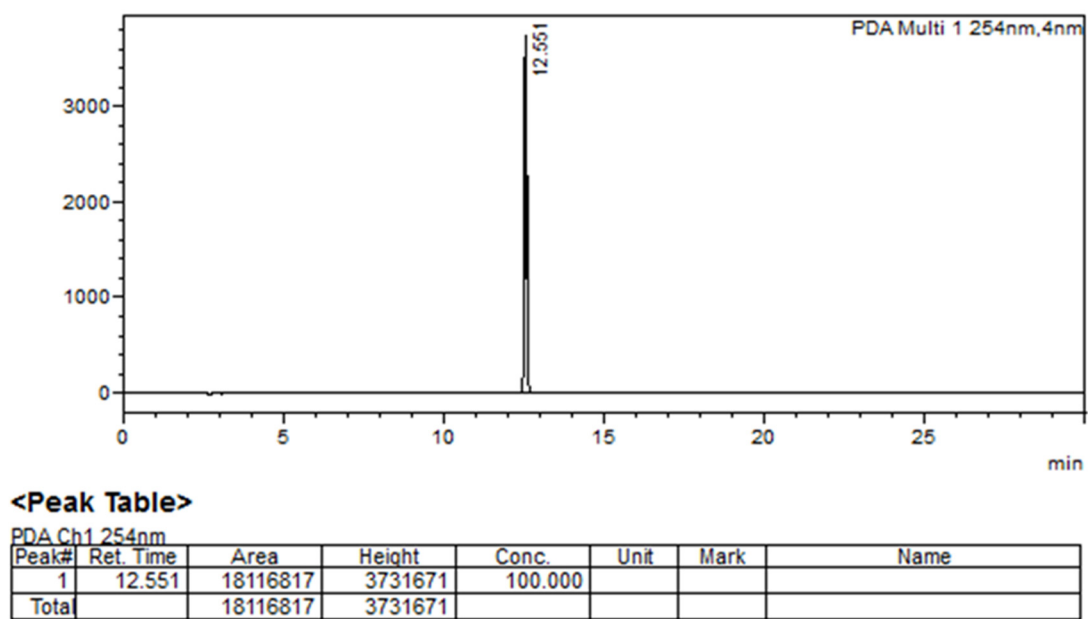

Figure S15. HPLC chromatogram of **16** determined by method B.

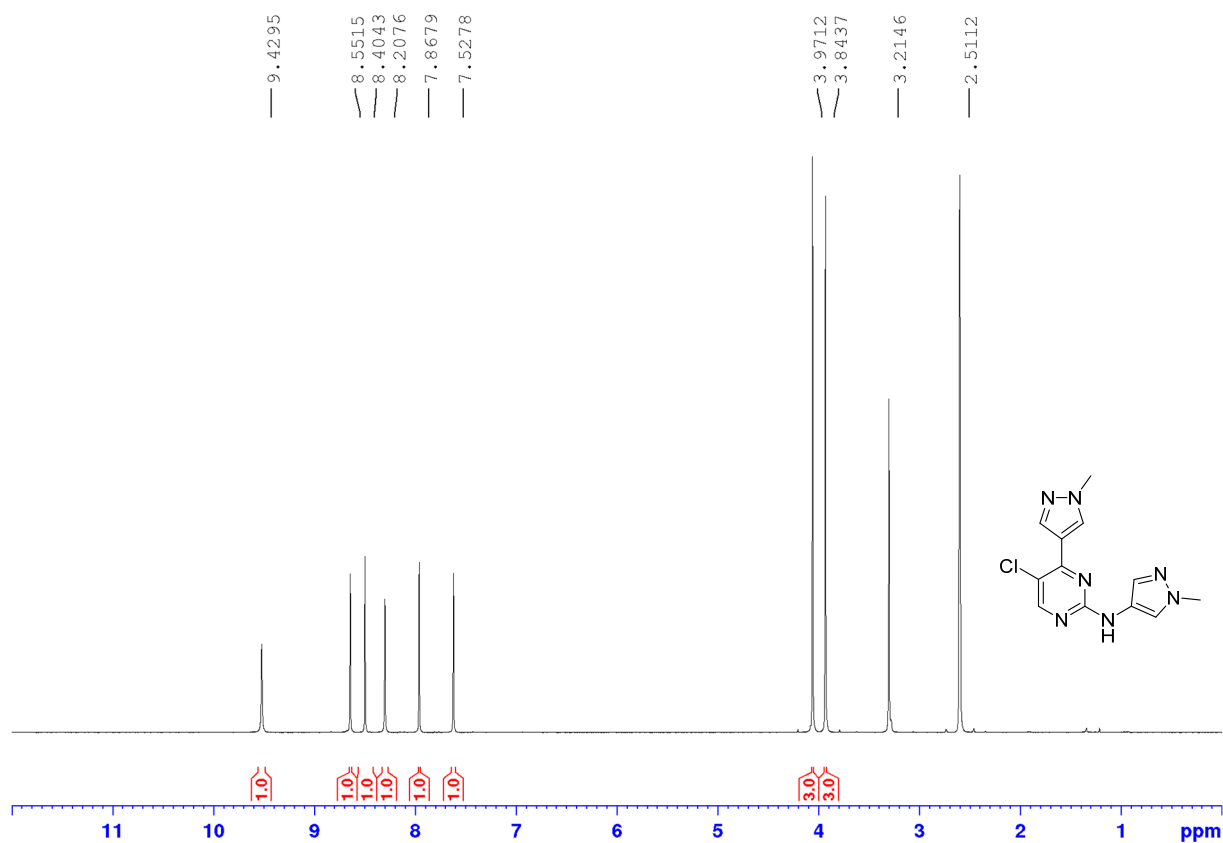

Figure S16.  $^1\text{H}$  NMR spectrum of **17** in  $\text{DMSO}-d_6$  (500 MHz).

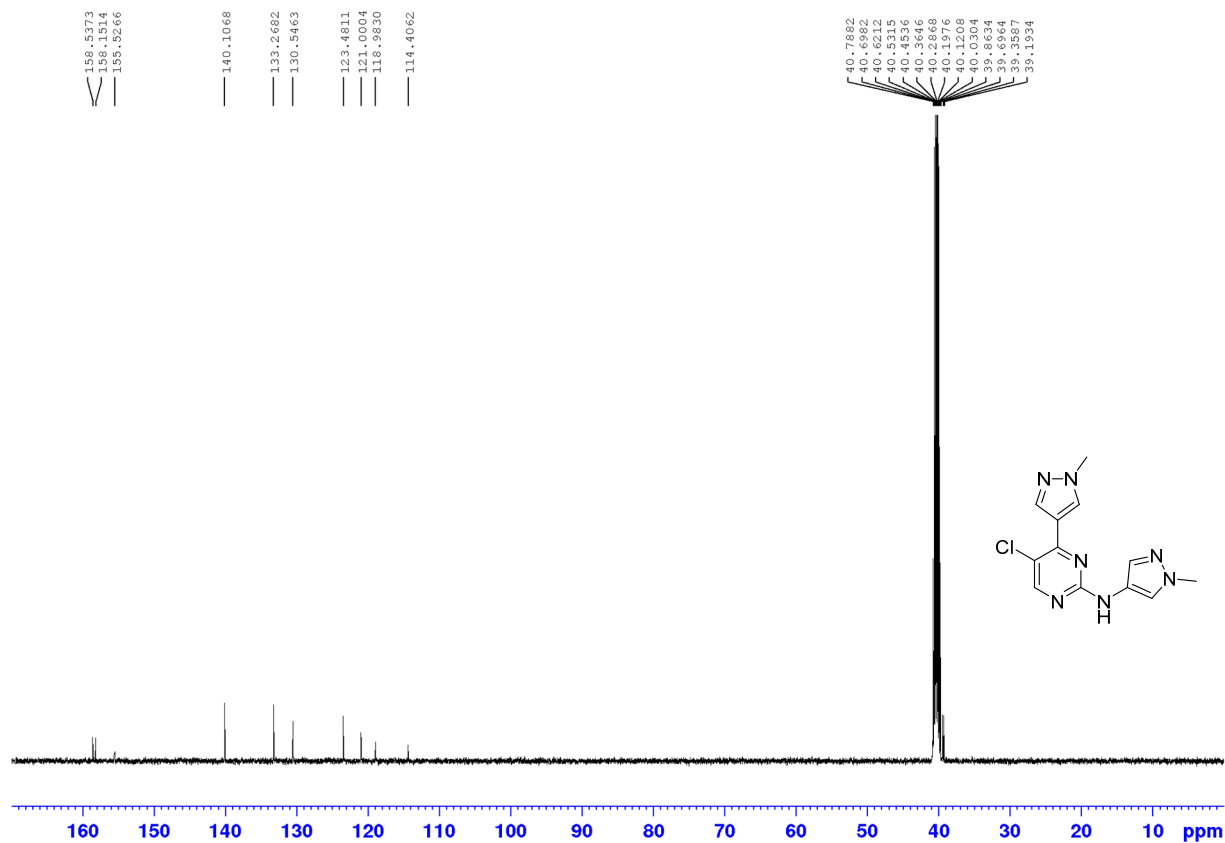

Figure S17. <sup>13</sup>C NMR spectrum of 17 in DMSO-*d*<sub>6</sub> (125 MHz).

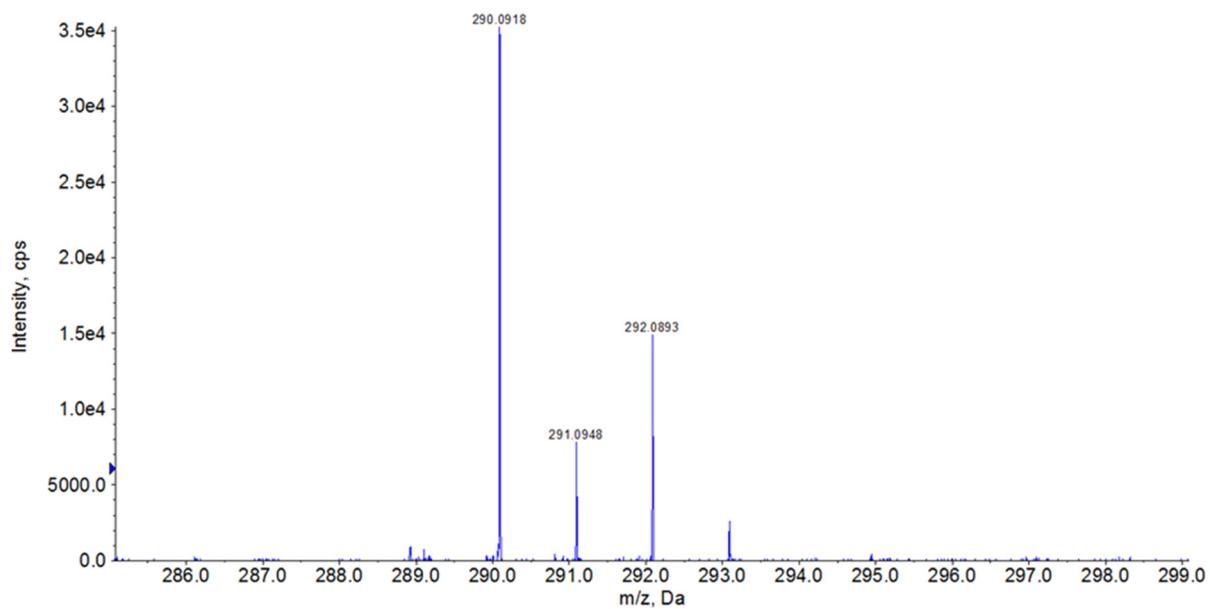

Figure S18. HRMS of 17.

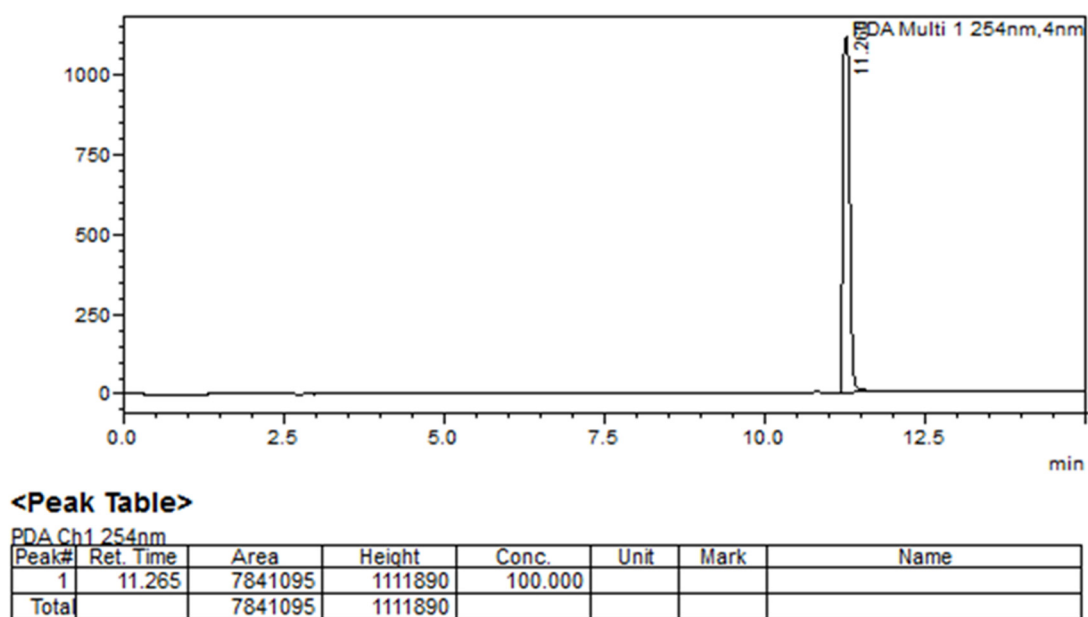

Figure S19. HPLC chromatogram of **17** determined by method A.

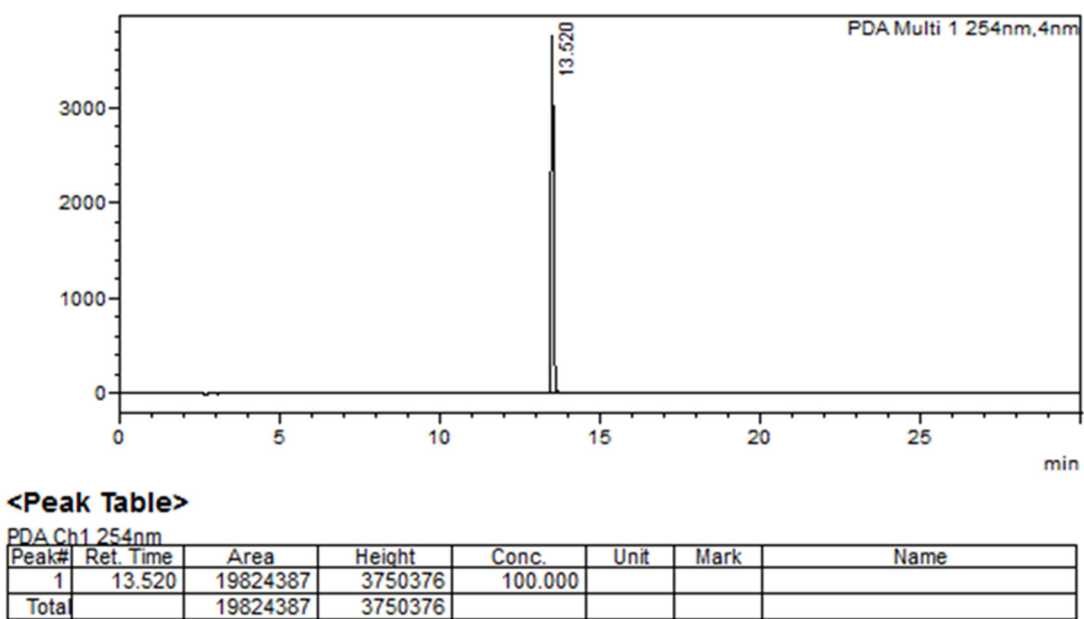

Figure S20. HPLC chromatogram of **17** determined by method B.

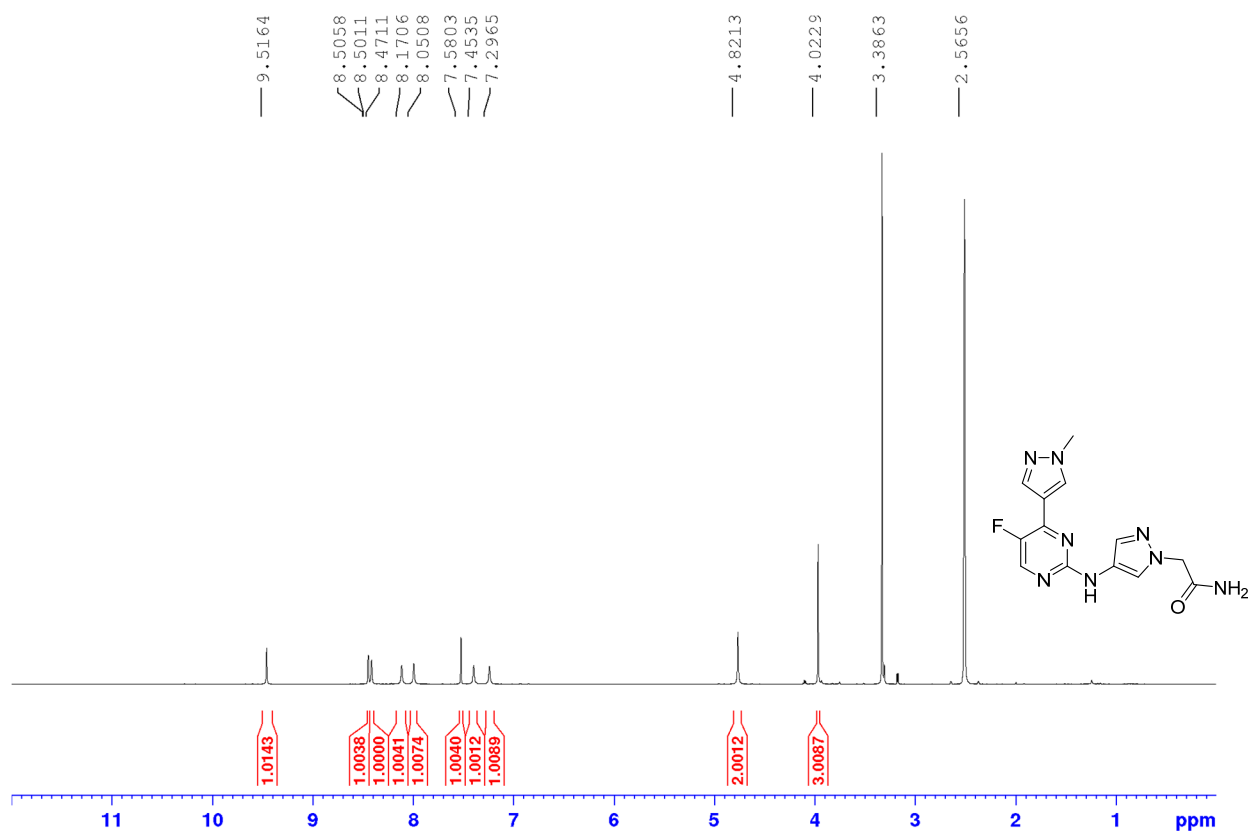

Figure S21. <sup>1</sup>H NMR spectrum of 18 in DMSO-*d*<sub>6</sub> (500 MHz).

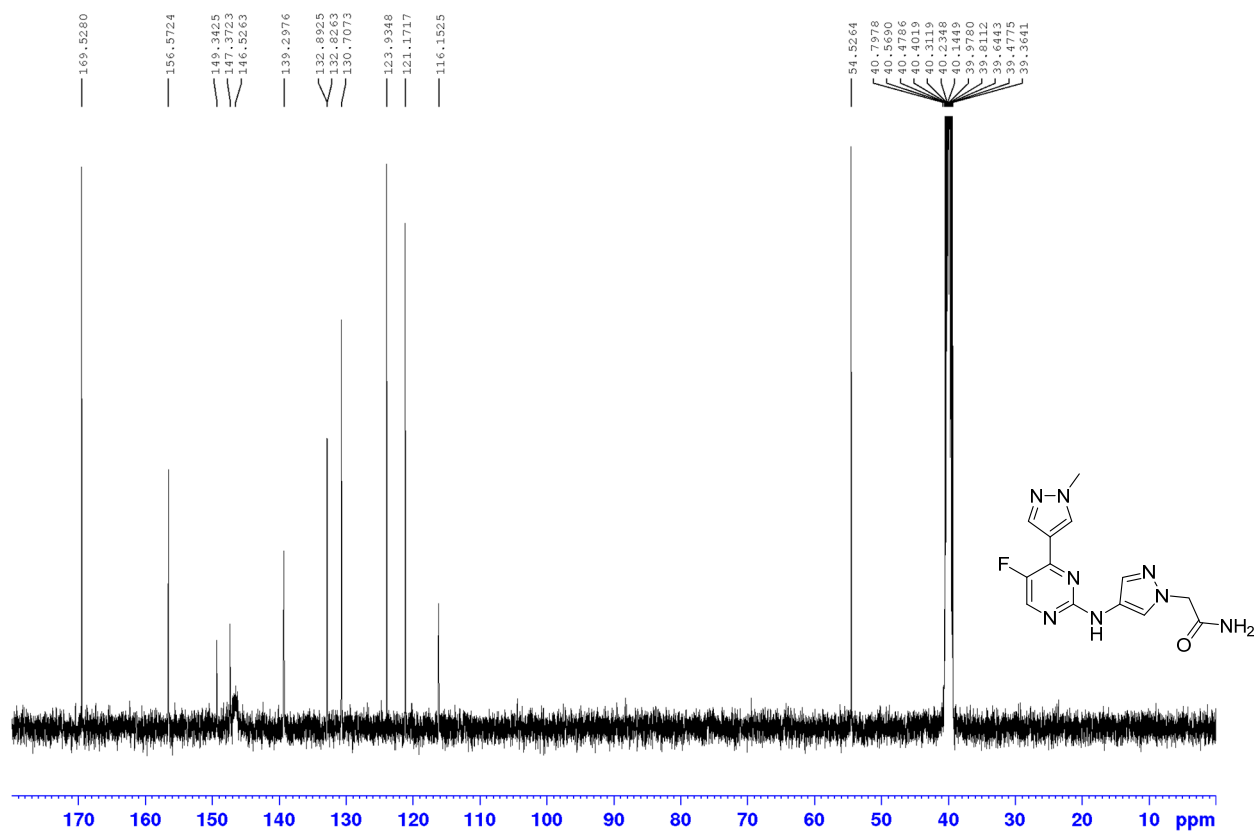

Figure S22. <sup>13</sup>C NMR spectrum of 18 in DMSO-*d*<sub>6</sub> (125 MHz).

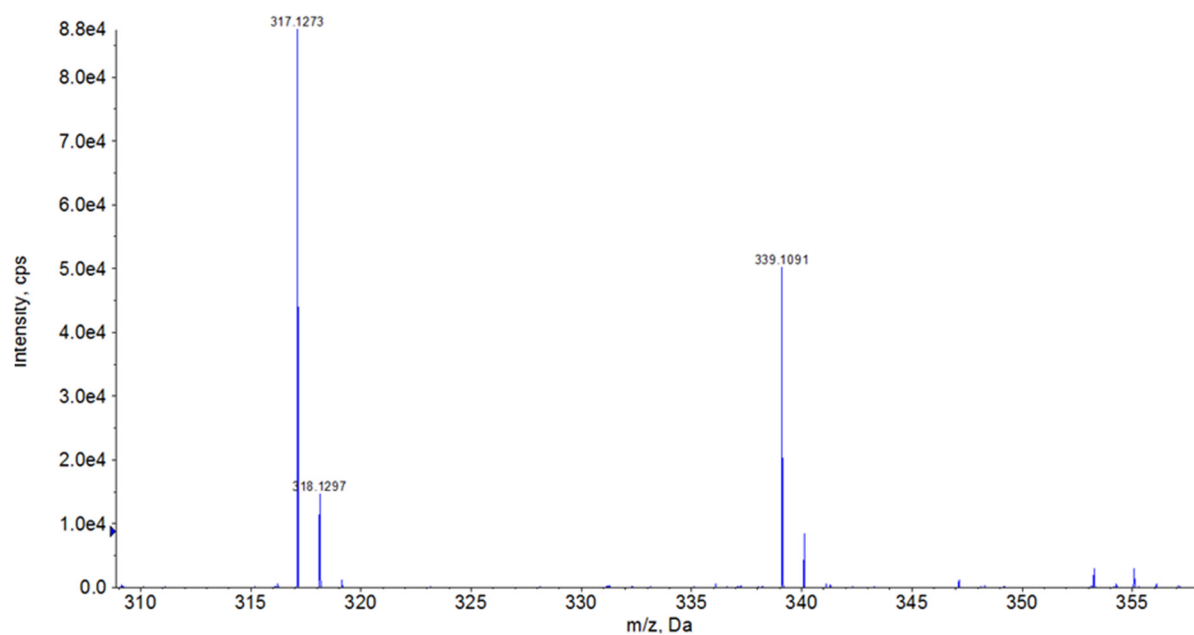

Figure S23. HRMS of 18.

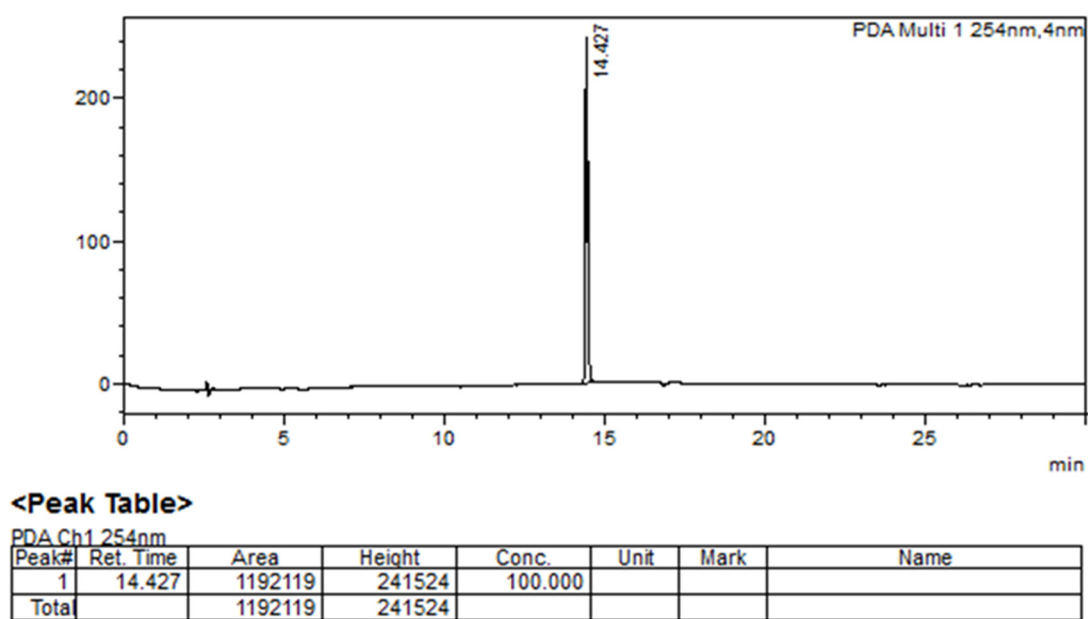

Figure S24. HPLC chromatogram of 18 determined by method A.

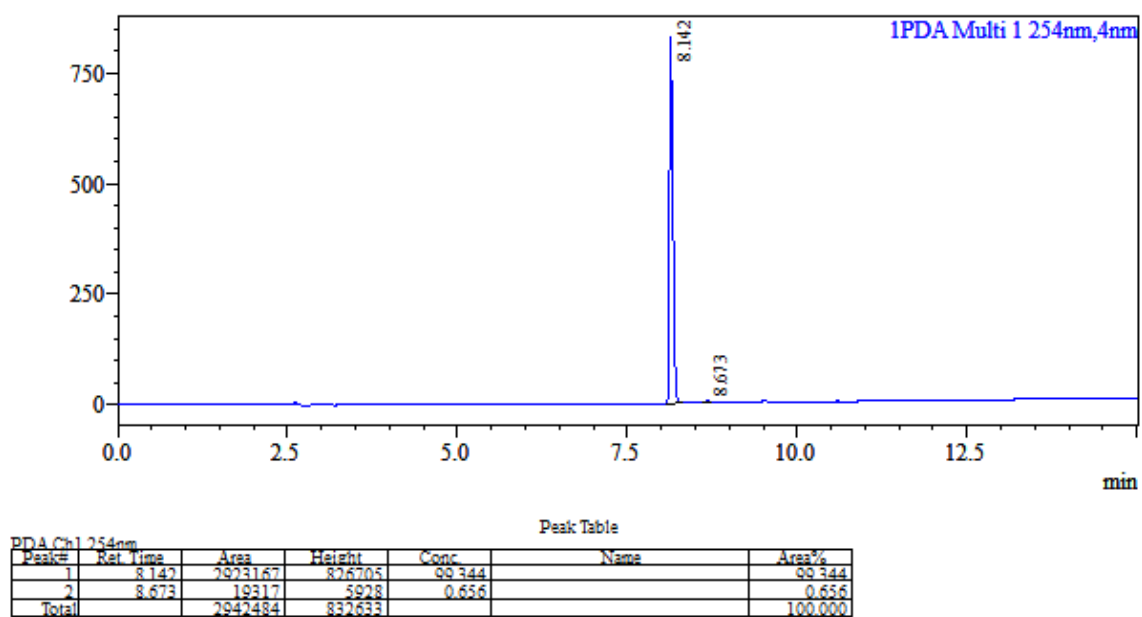

Figure S25. HPLC chromatogram of **18** determined by method B.

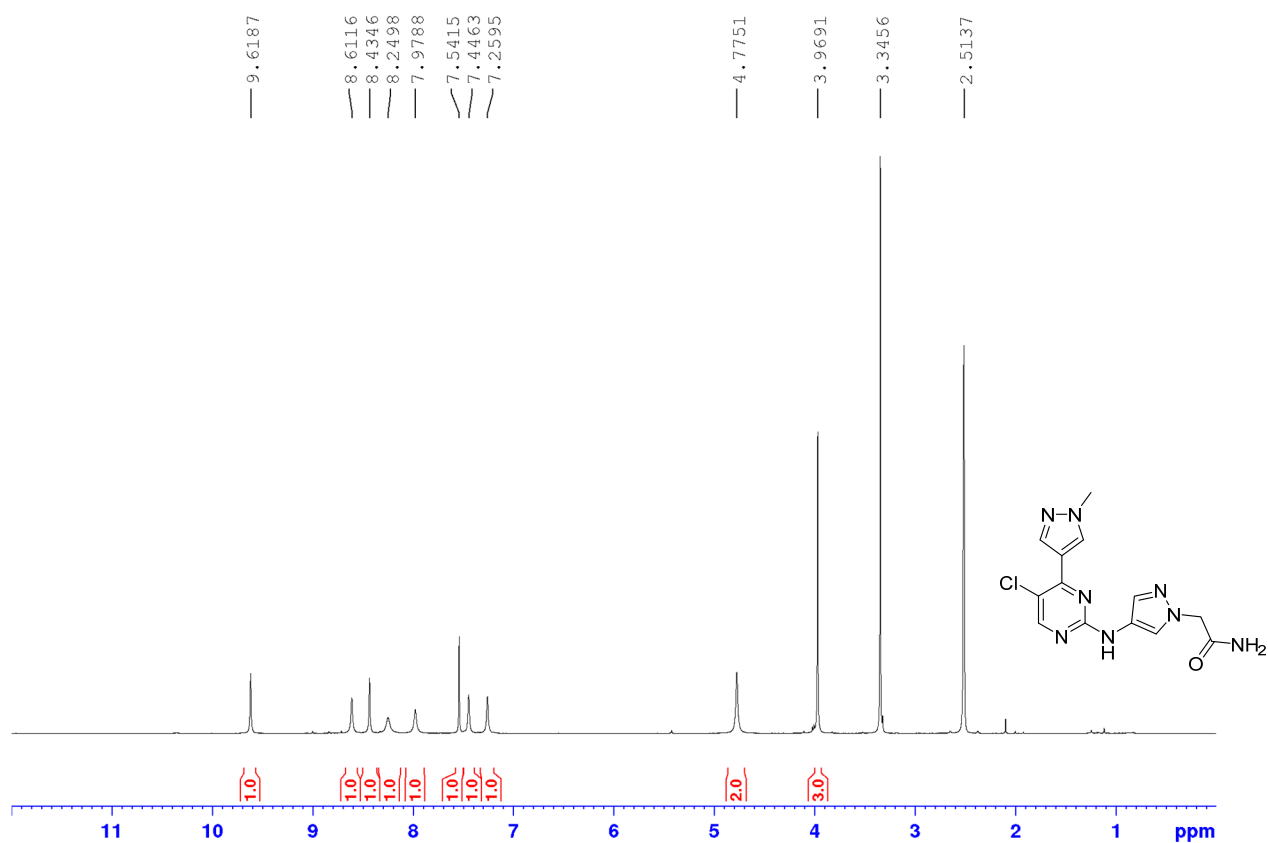

Figure S26.  $^1\text{H}$  NMR spectrum of **19** in  $\text{DMSO}-d_6$  (500 MHz).

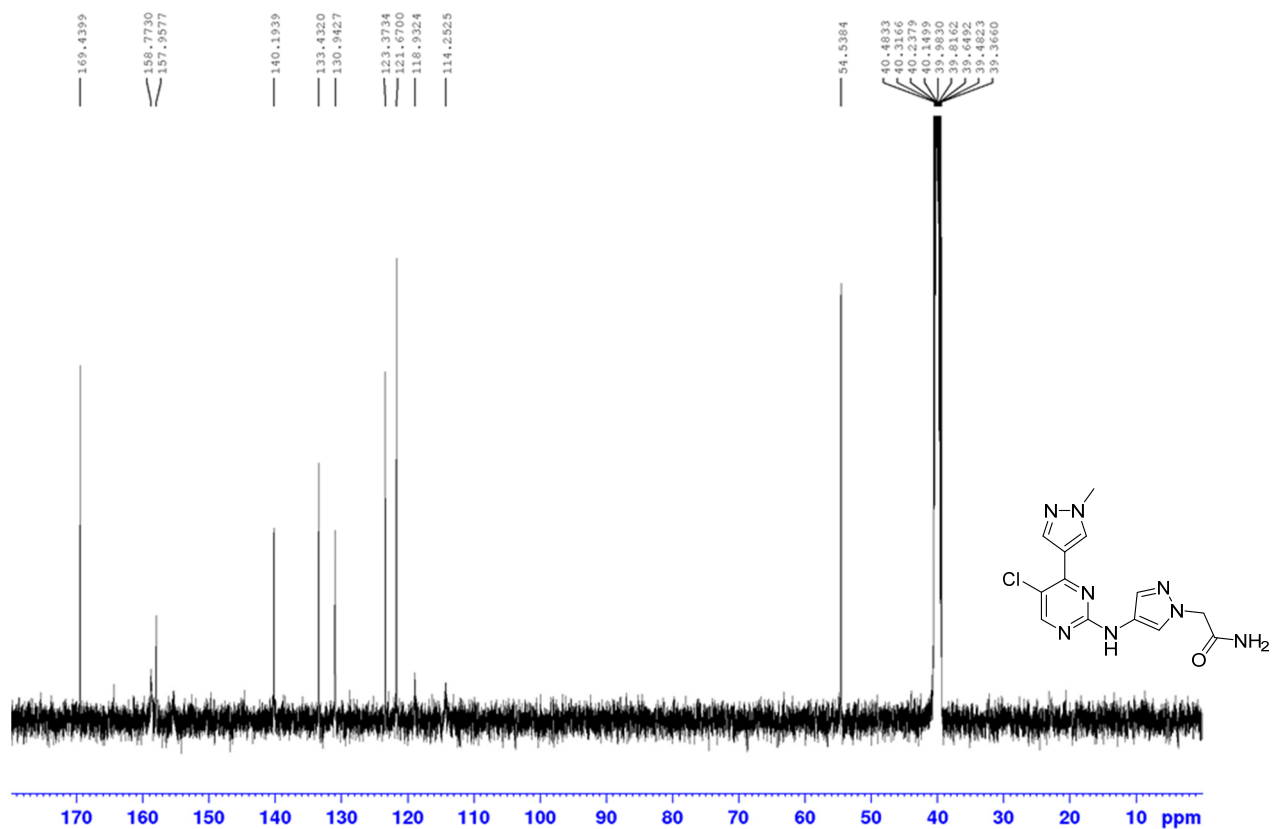

**Figure S27.**  $^{13}\text{C}$  NMR spectrum of **19** in  $\text{DMSO-}d_6$  (125 MHz).

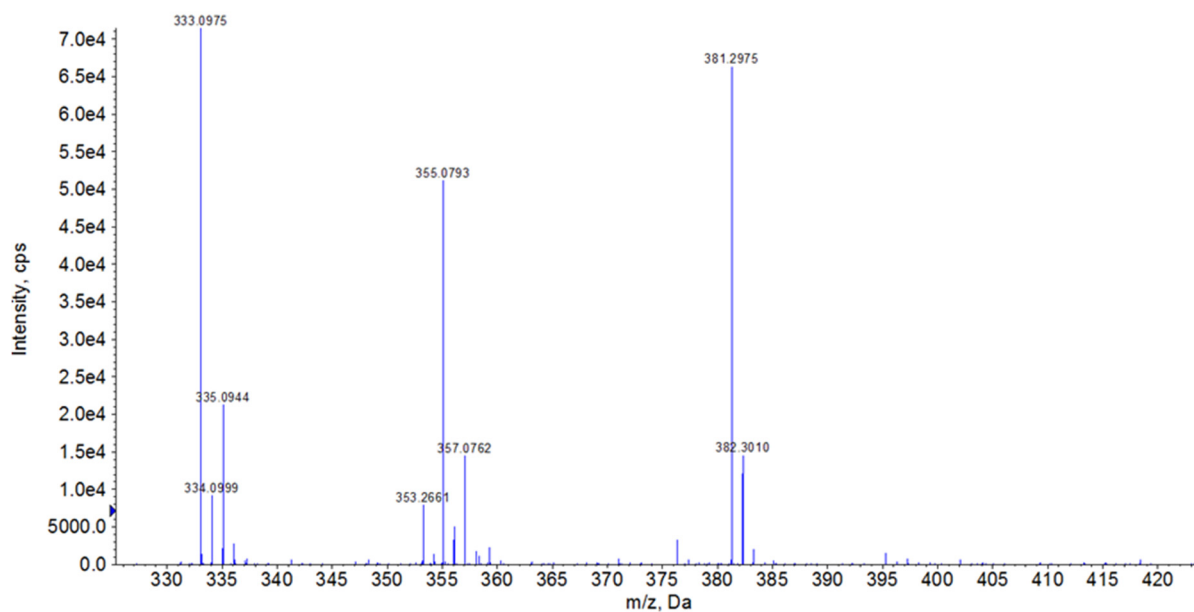

**Figure S28.** HRMS of **19**.

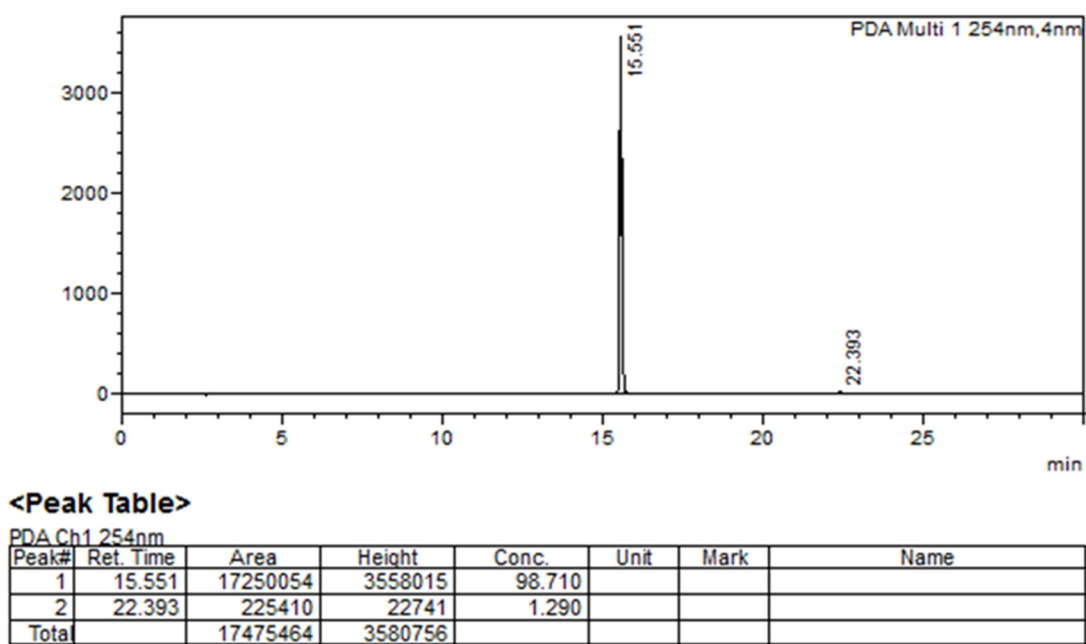

Figure S29. HPLC chromatogram of **19** determined by method A.

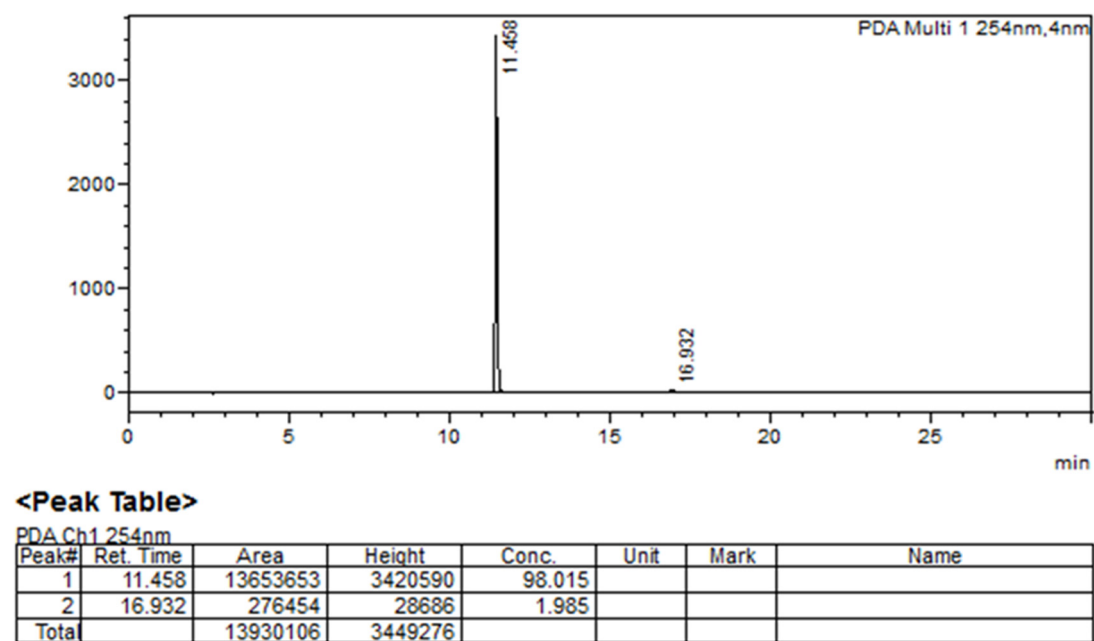

Figure S30. HPLC chromatogram of **19** determined by method B.

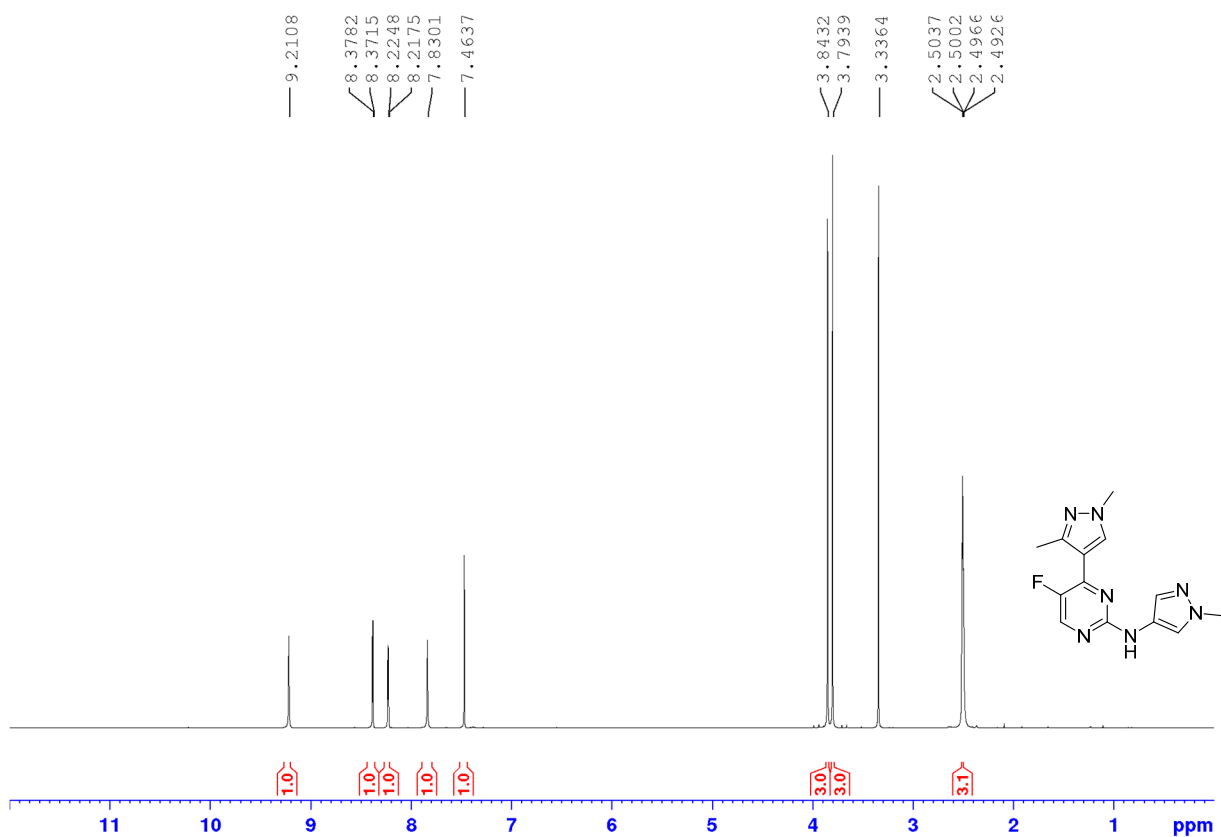

Figure S31. <sup>1</sup>H NMR spectrum of **20** in DMSO-*d*<sub>6</sub> (500 MHz).

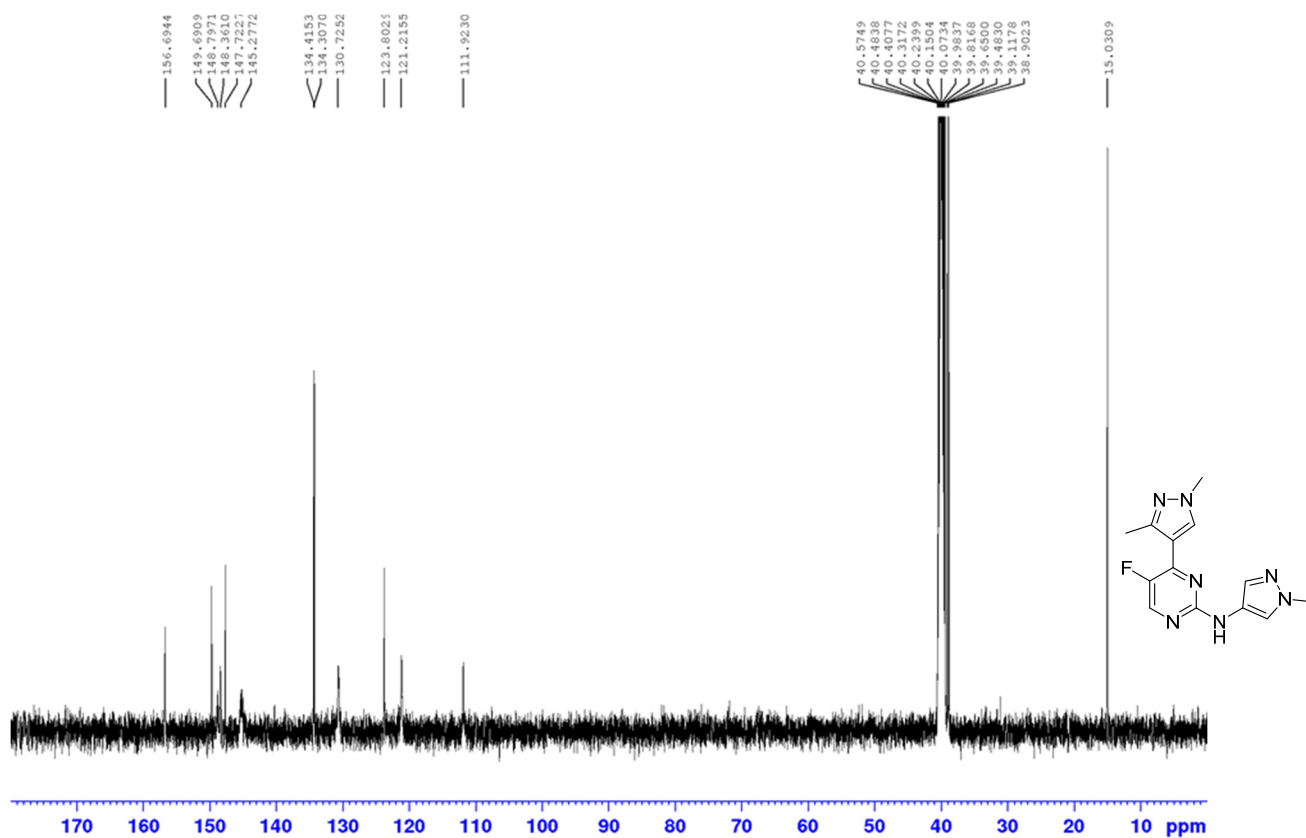

Figure S32. <sup>13</sup>C NMR spectrum of **20** in DMSO-*d*<sub>6</sub> (125 MHz).

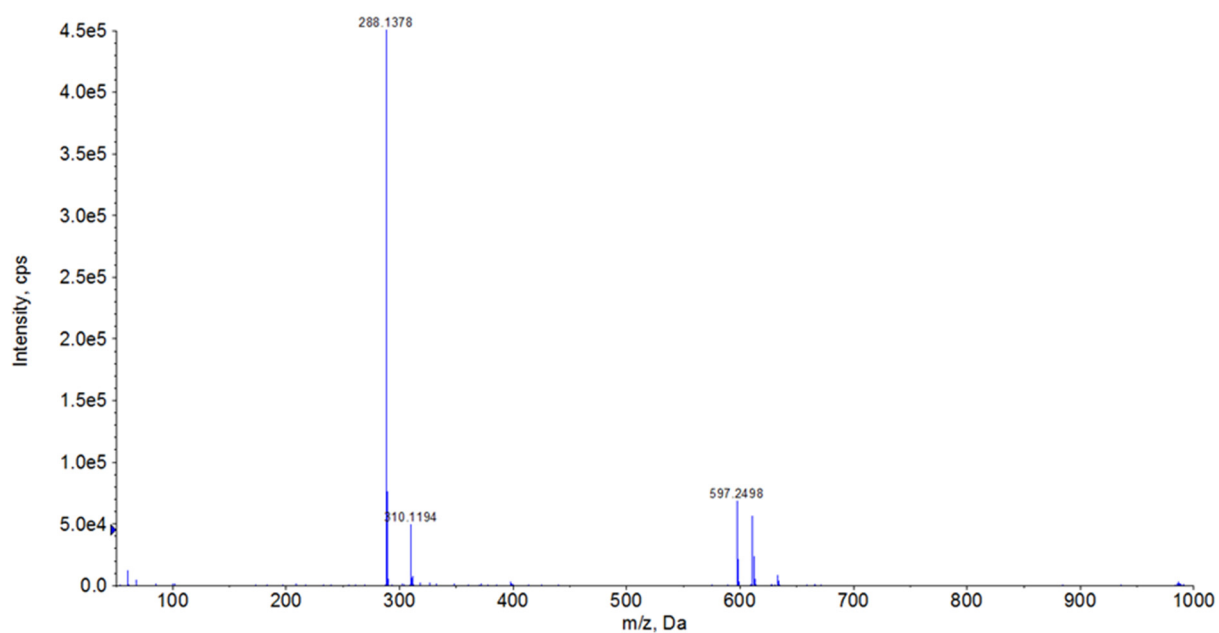

Figure S33. HRMS of 20.

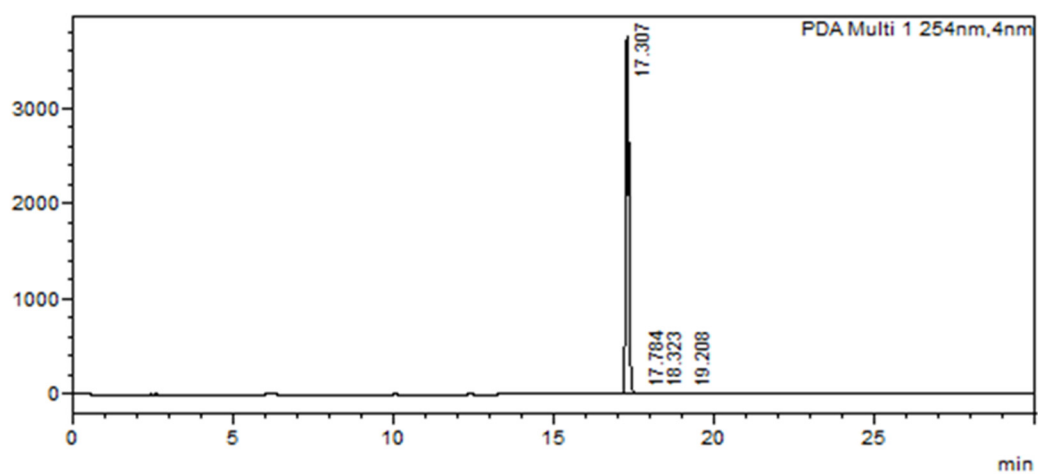

<Peak Table>

| PDA Ch1 254nm |           |          |         |        |      |      |      |
|---------------|-----------|----------|---------|--------|------|------|------|
| Peak#         | Ret. Time | Area     | Height  | Conc.  | Unit | Mark | Name |
| 1             | 17.307    | 26888821 | 3741374 | 99.509 |      |      |      |
| 2             | 17.784    | 67519    | 11908   | 0.250  |      | V    |      |
| 3             | 18.323    | 38741    | 8003    | 0.143  |      |      |      |
| 4             | 19.208    | 26320    | 5714    | 0.097  |      |      |      |
| Total         |           | 27021403 | 3766999 |        |      |      |      |

Figure S34. HPLC chromatogram of 20 determined by method A.

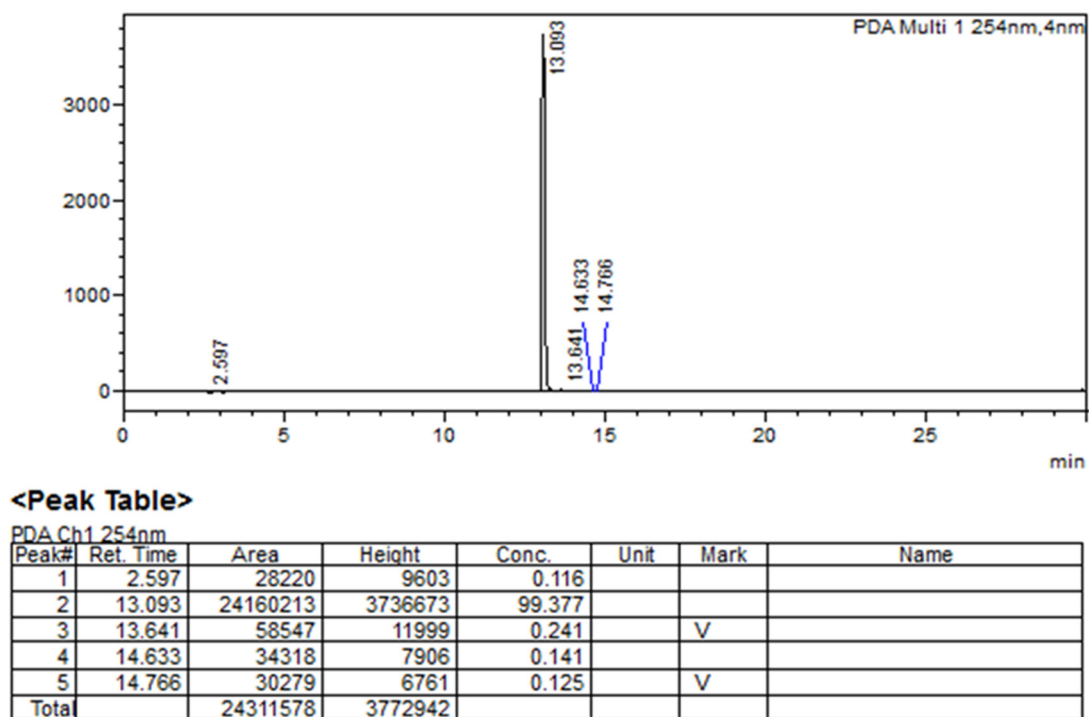

Figure S35. HPLC chromatogram of 20 determined by method B.

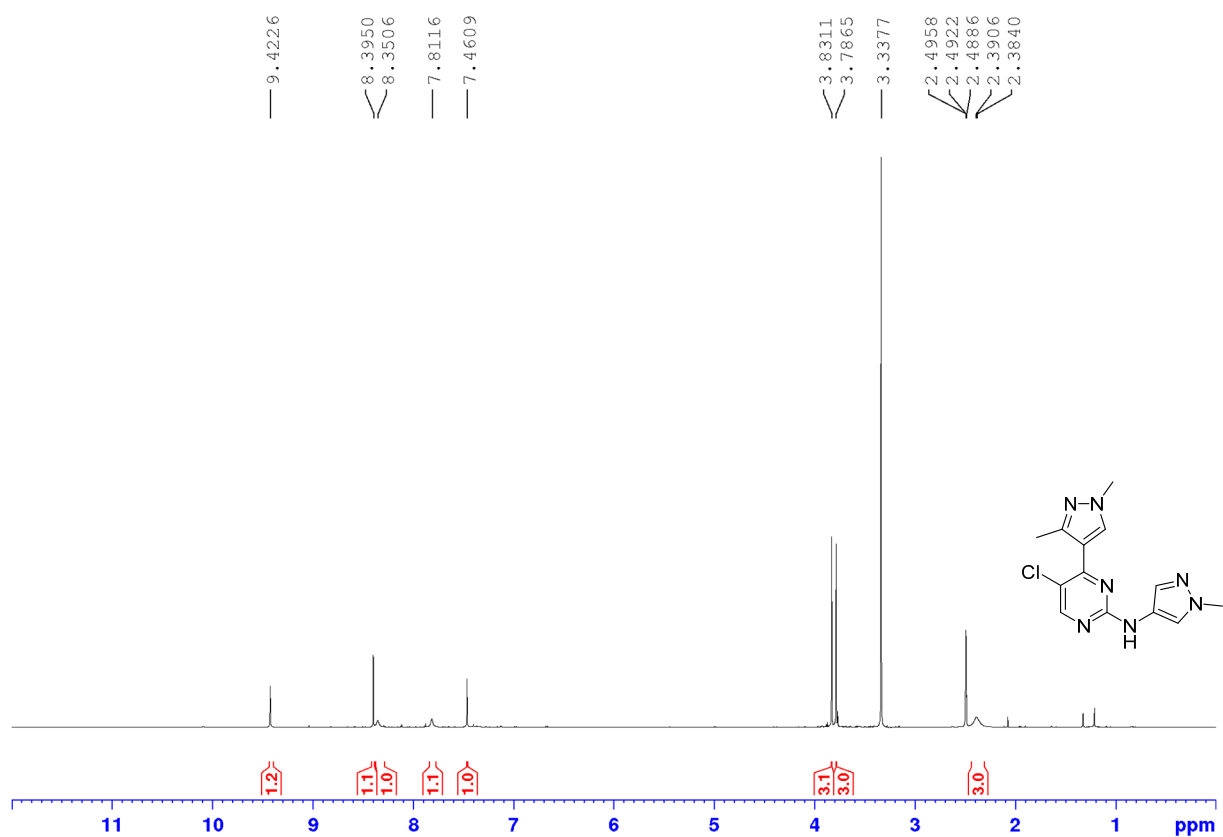

Figure S36. <sup>1</sup>H NMR spectrum of 21 in DMSO-*d*<sub>6</sub> (500 MHz).



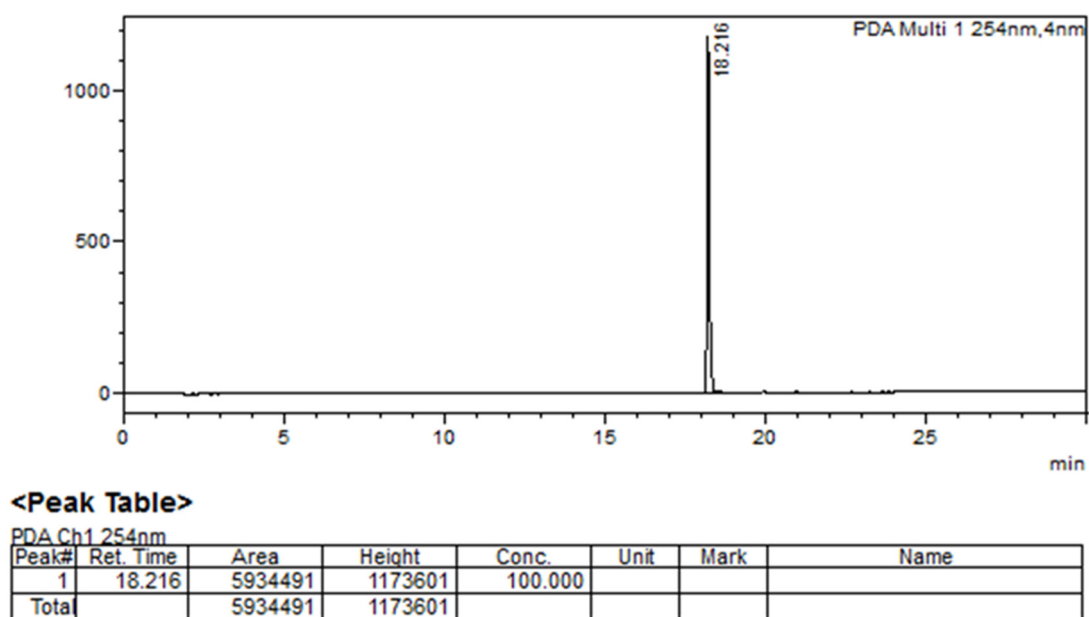

Figure S39. HPLC chromatogram of **21** determined by method A.

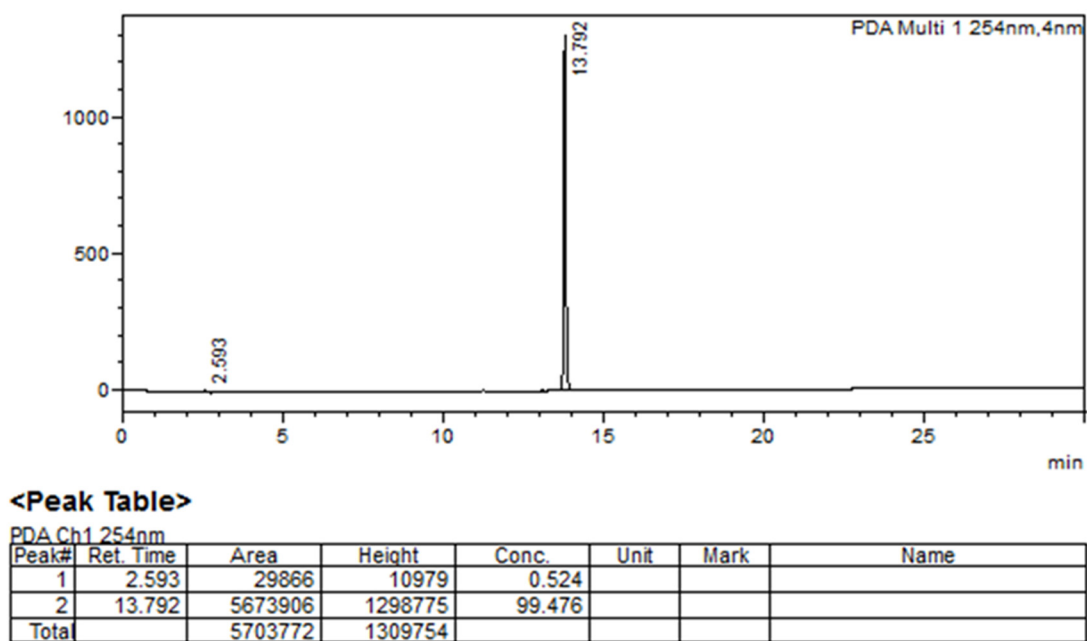

Figure S40. HPLC chromatogram of **21** determined by method B.

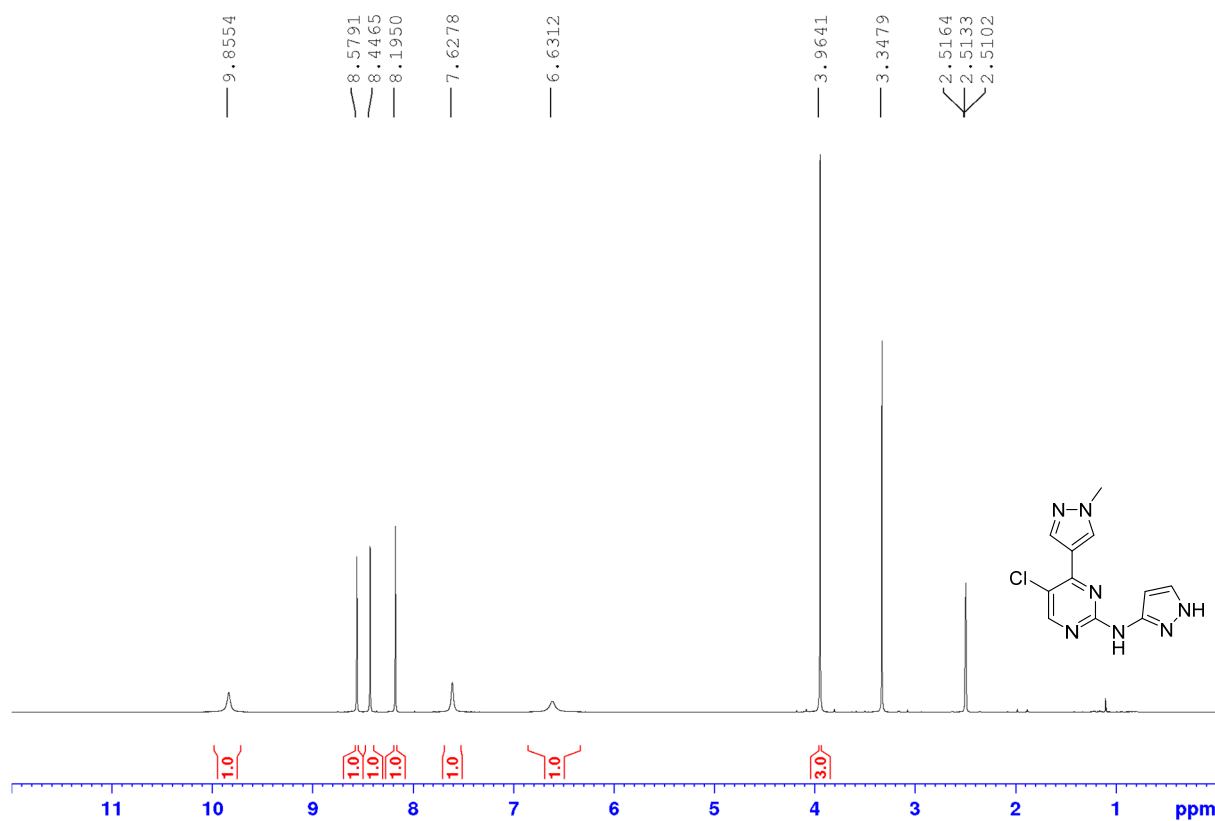

**Figure S41.** <sup>1</sup>H NMR spectrum of **23** in DMSO-*d*<sub>6</sub> (500 MHz).

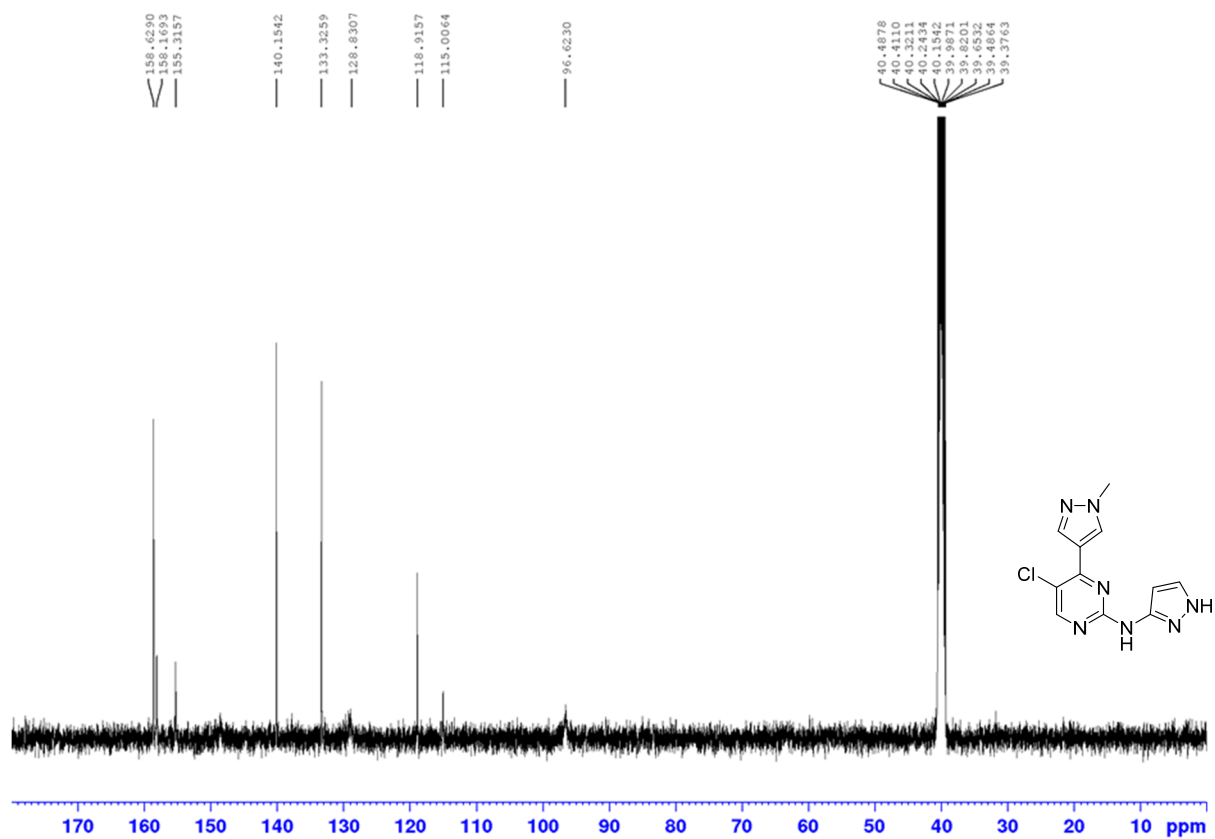

**Figure S42.** <sup>13</sup>C NMR spectrum of **23** in DMSO-*d*<sub>6</sub> (125 MHz).

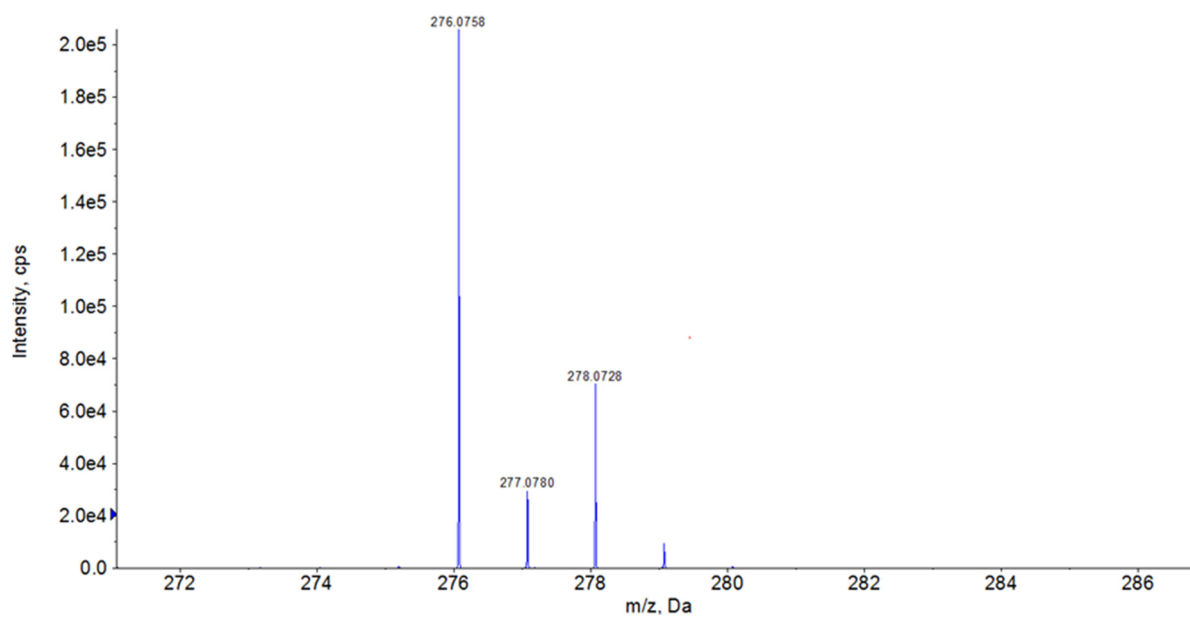

Figure S43. HRMS of 23.

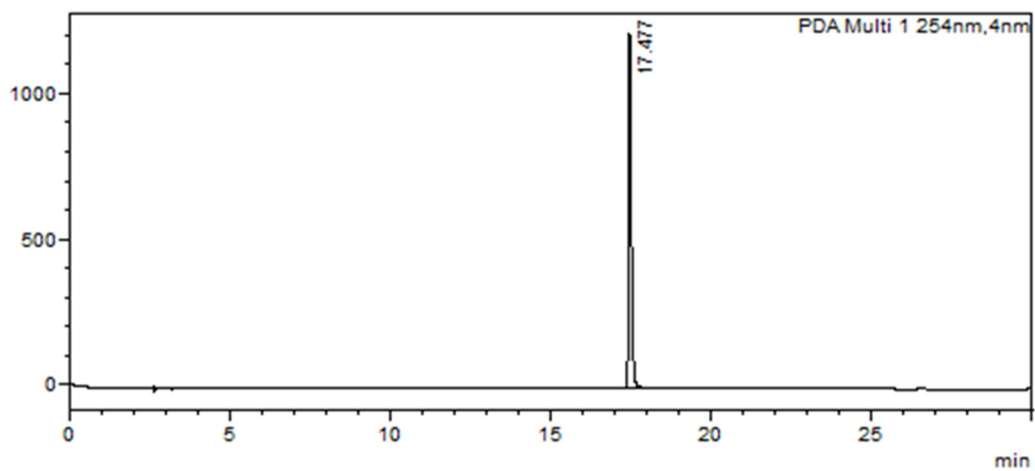

<Peak Table>

PDA Ch1 254nm

| Peak# | Ret. Time | Area    | Height  | Conc.   | Unit | Mark | Name |
|-------|-----------|---------|---------|---------|------|------|------|
| 1     | 17.477    | 6660849 | 1213114 | 100.000 |      |      |      |
| Total |           | 6660849 | 1213114 |         |      |      |      |

Figure S44. HPLC chromatogram of 23 determined by method A.

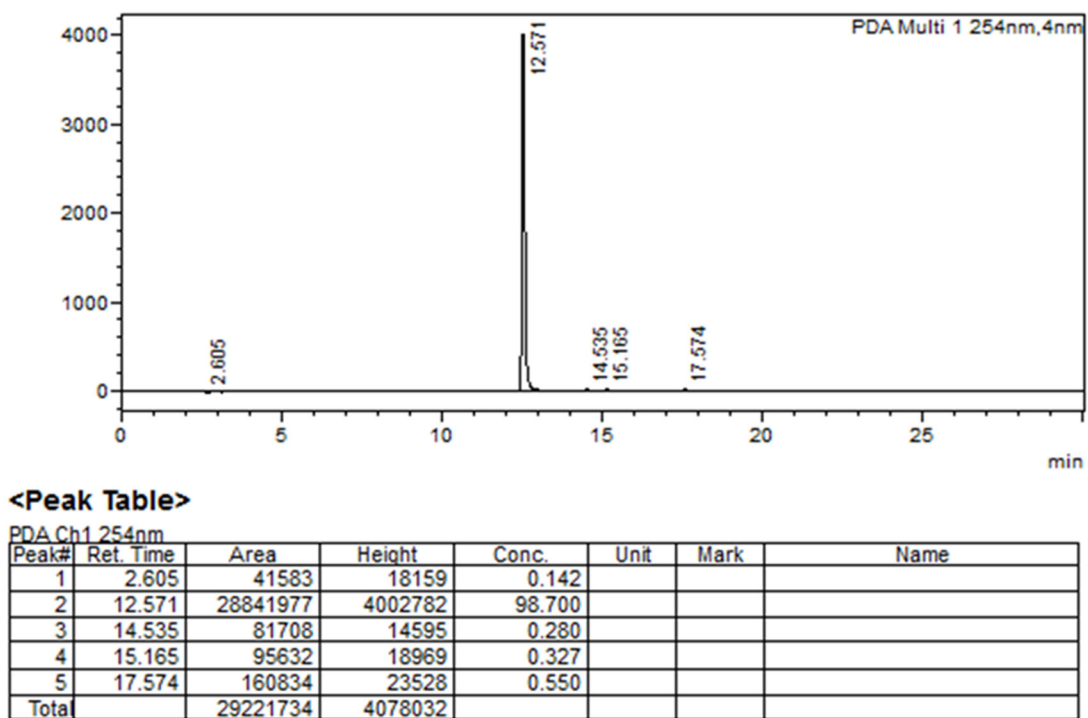

Figure S45. HPLC chromatogram of **23** determined by method B.

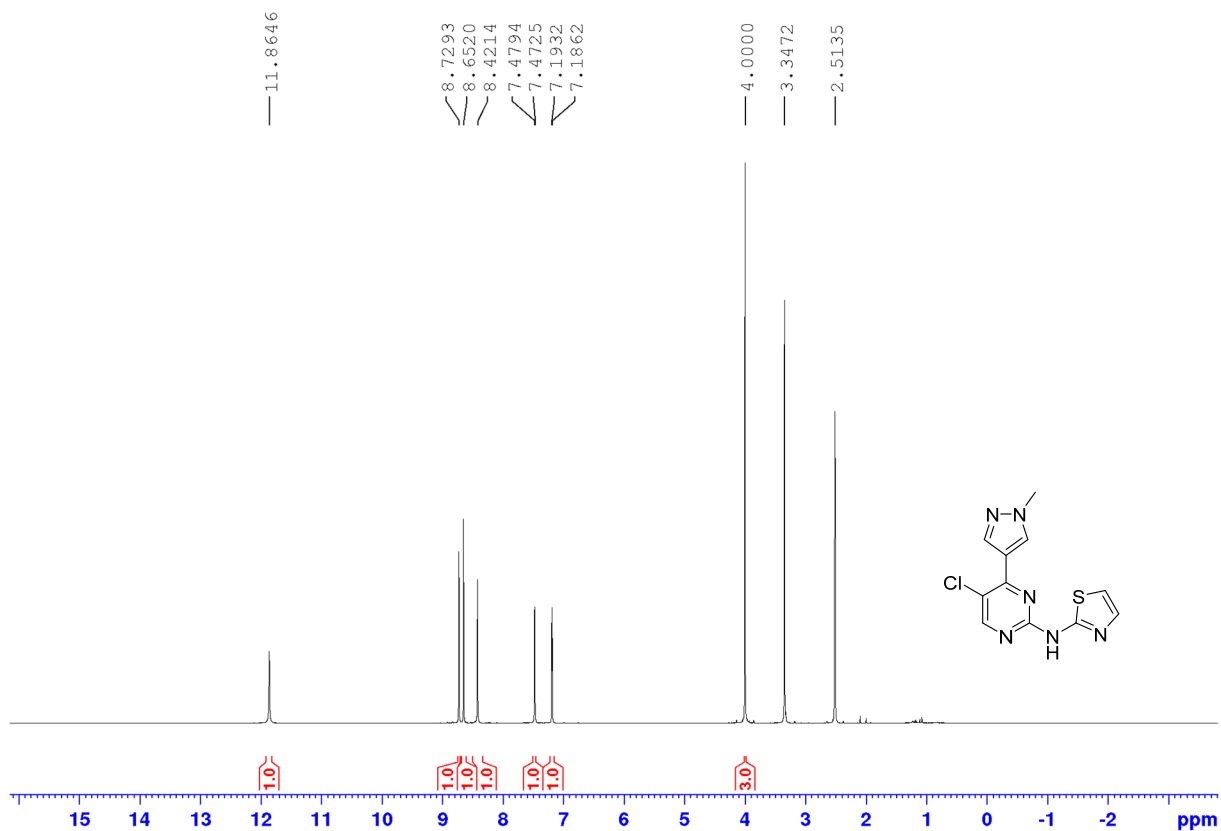

Figure S46.  $^1\text{H}$  NMR spectrum of **25** in  $\text{DMSO-}d_6$  (500 MHz).

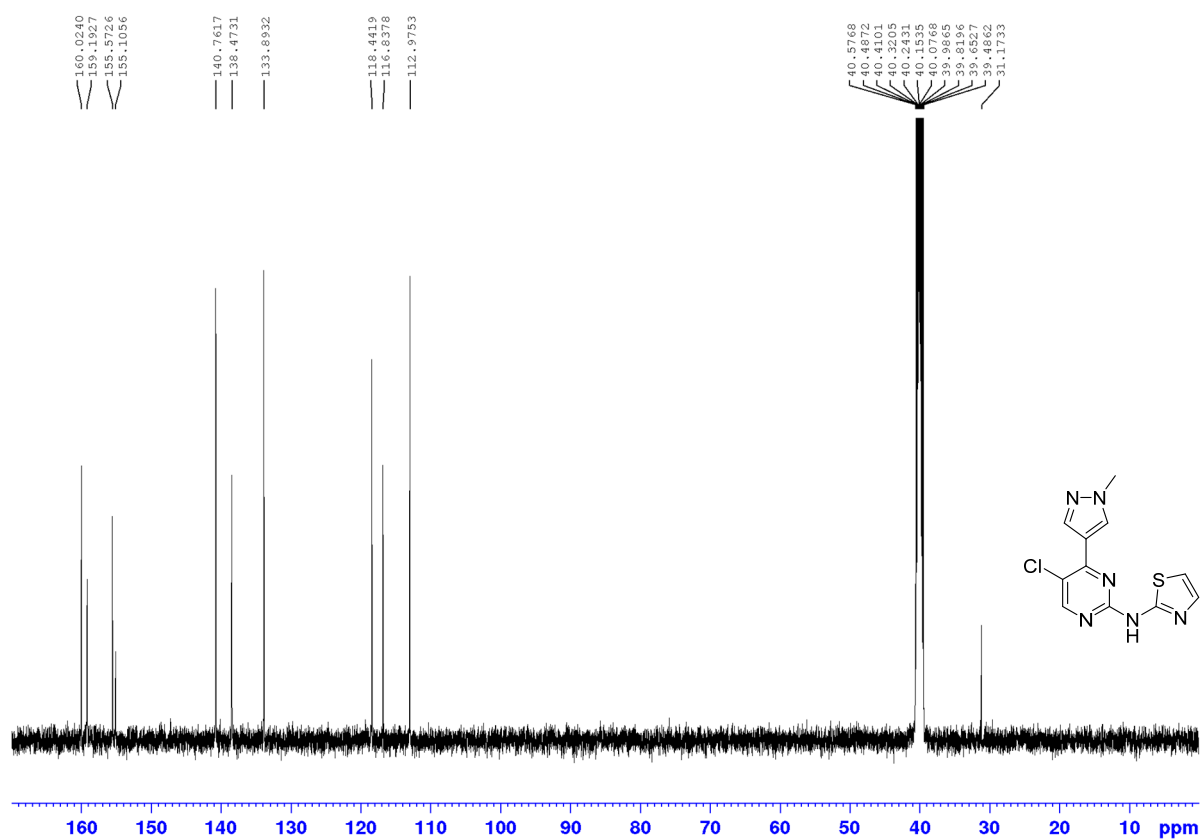

Figure S47. <sup>13</sup>C NMR spectrum of 25 in DMSO-*d*<sub>6</sub> (125 MHz).

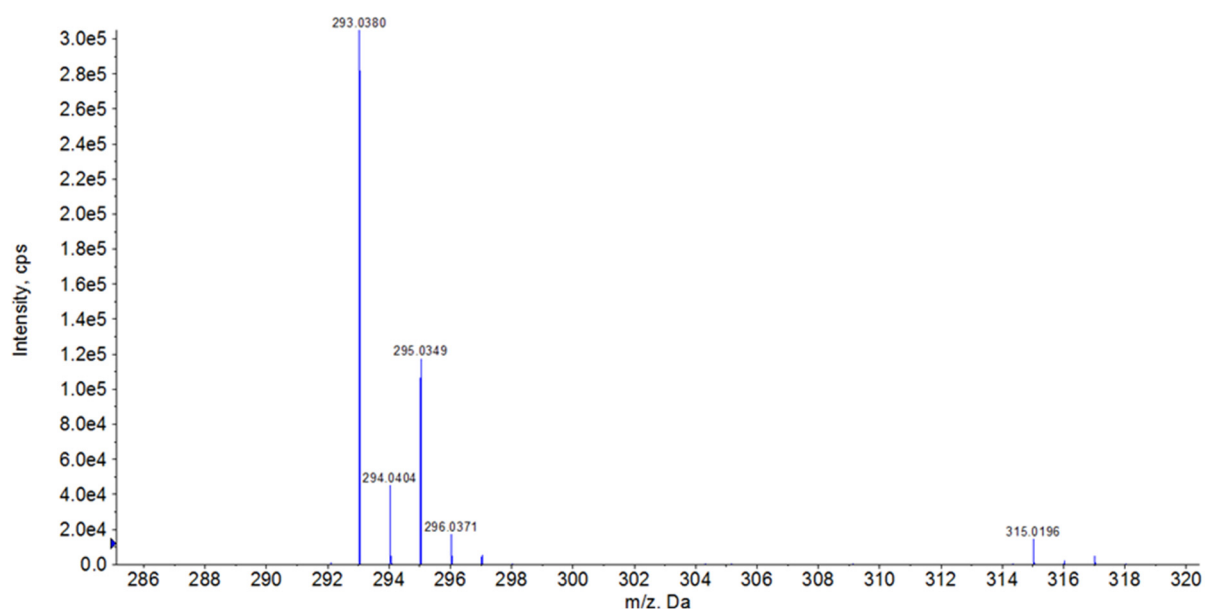

Figure S48. HRMS of 25.

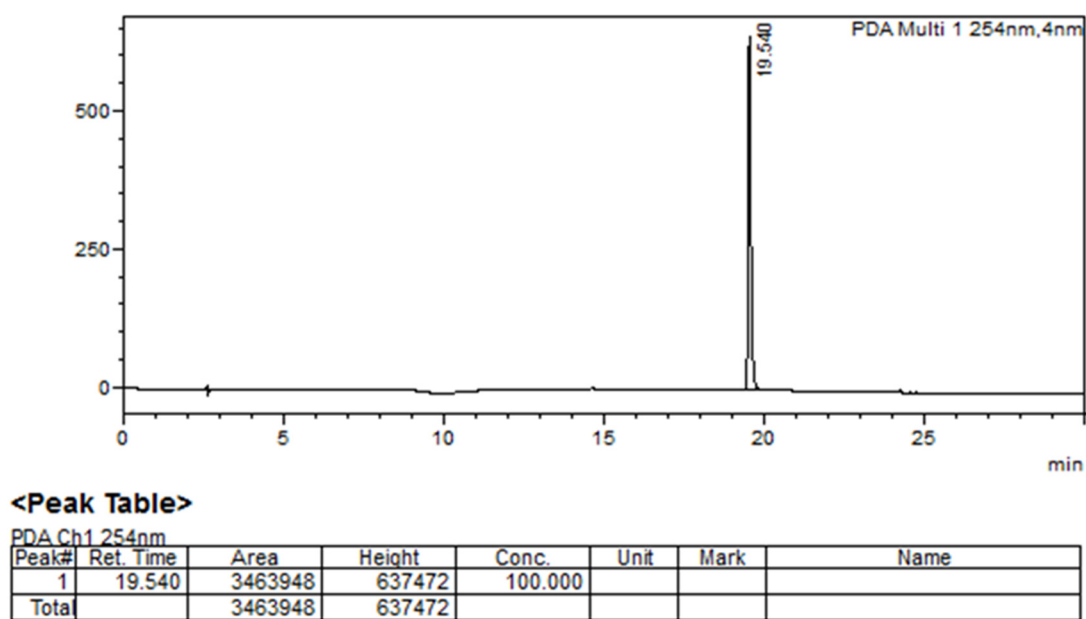

Figure S49. HPLC chromatogram of **25** determined by method A.

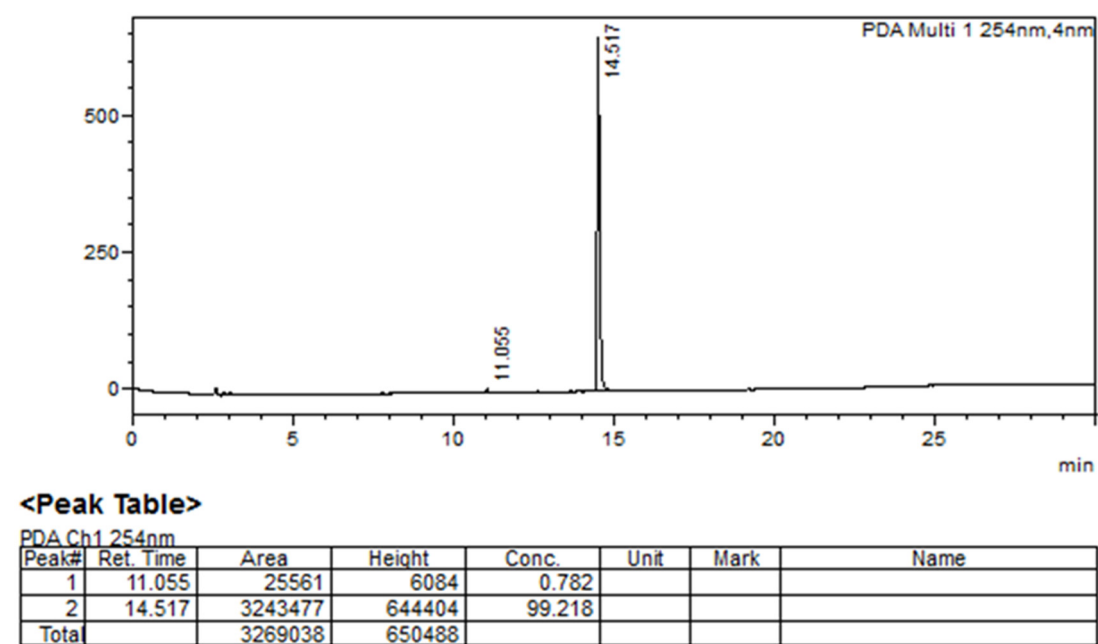

Figure S50. HPLC chromatogram of **25** determined by method B.

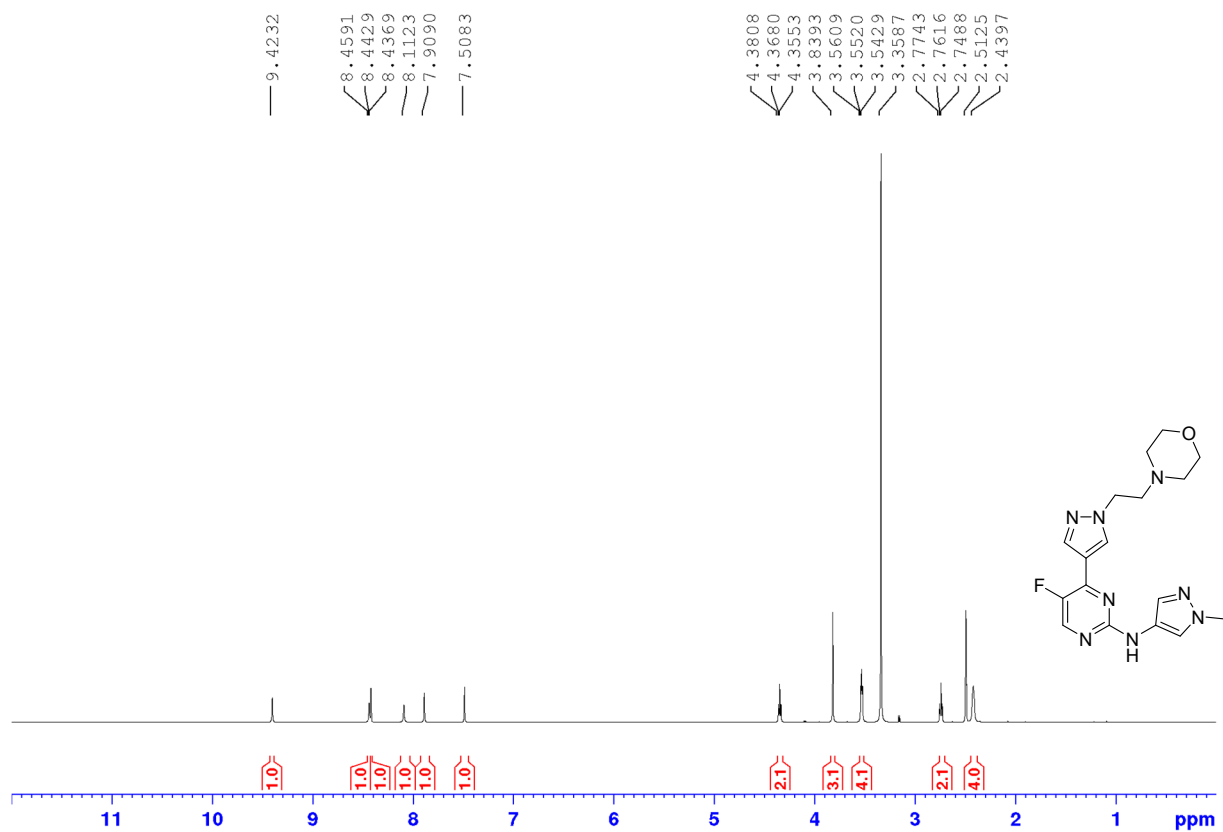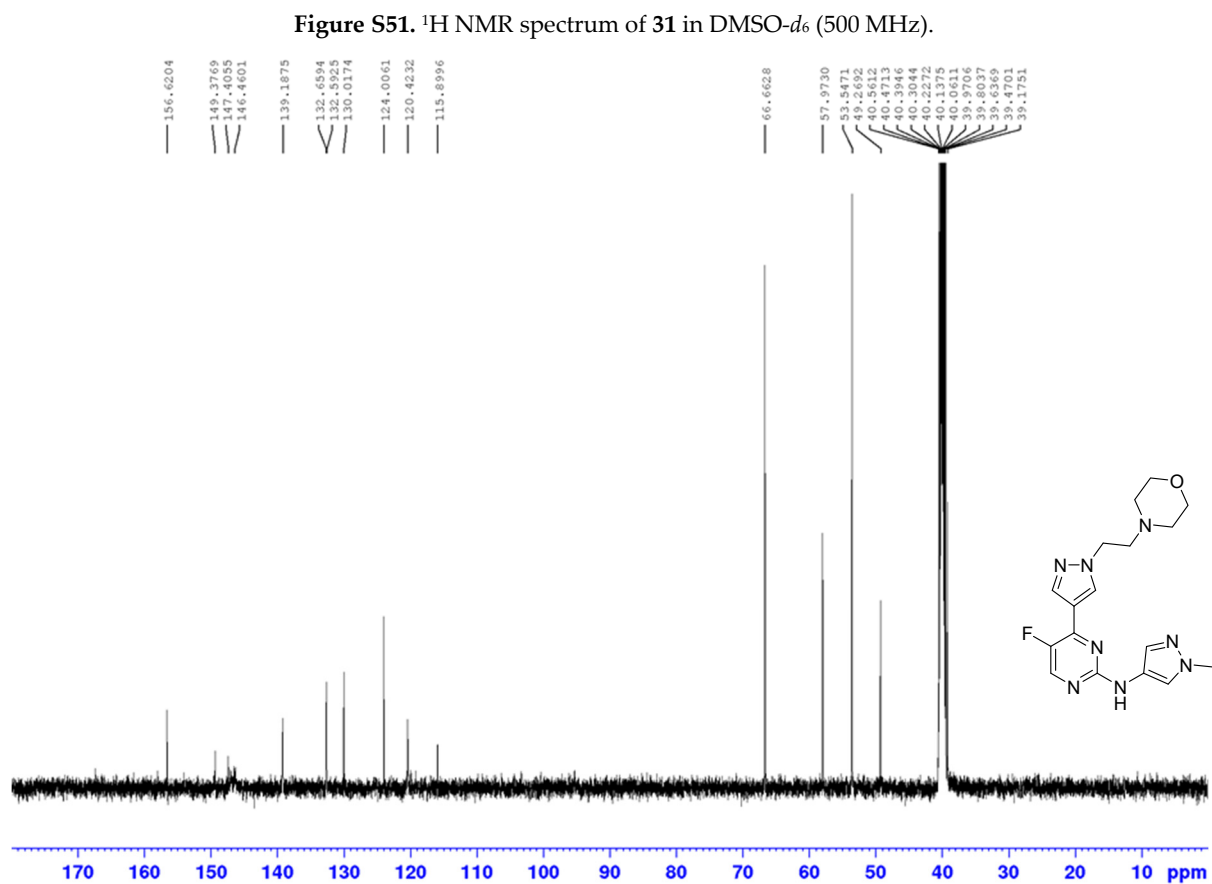

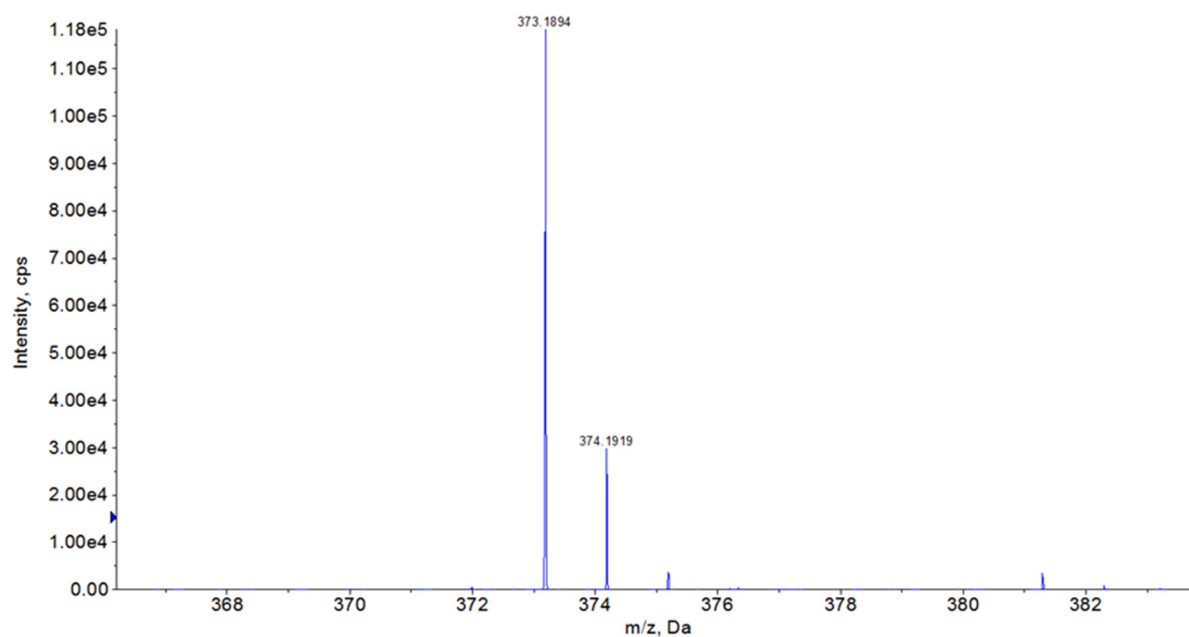

Figure S53. HRMS of 31.

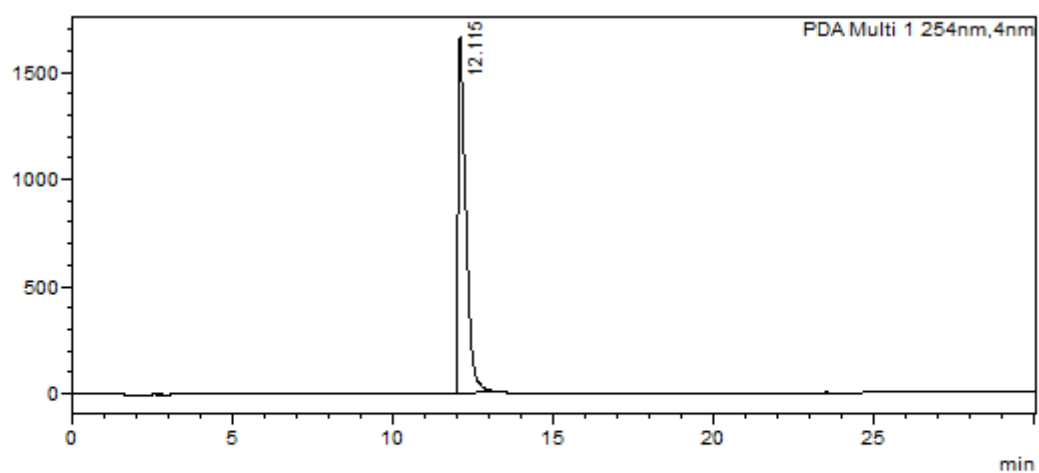

**<Peak Table>**

PDA Ch1 254nm

| Peak# | Ret. Time | Area     | Height  | Conc.   | Unit | Mark | Name |
|-------|-----------|----------|---------|---------|------|------|------|
| 1     | 12.115    | 27865018 | 1665937 | 100.000 |      |      |      |
| Total |           | 27865018 | 1665937 |         |      |      |      |

Figure S54. HPLC chromatogram of 31 determined by method A.

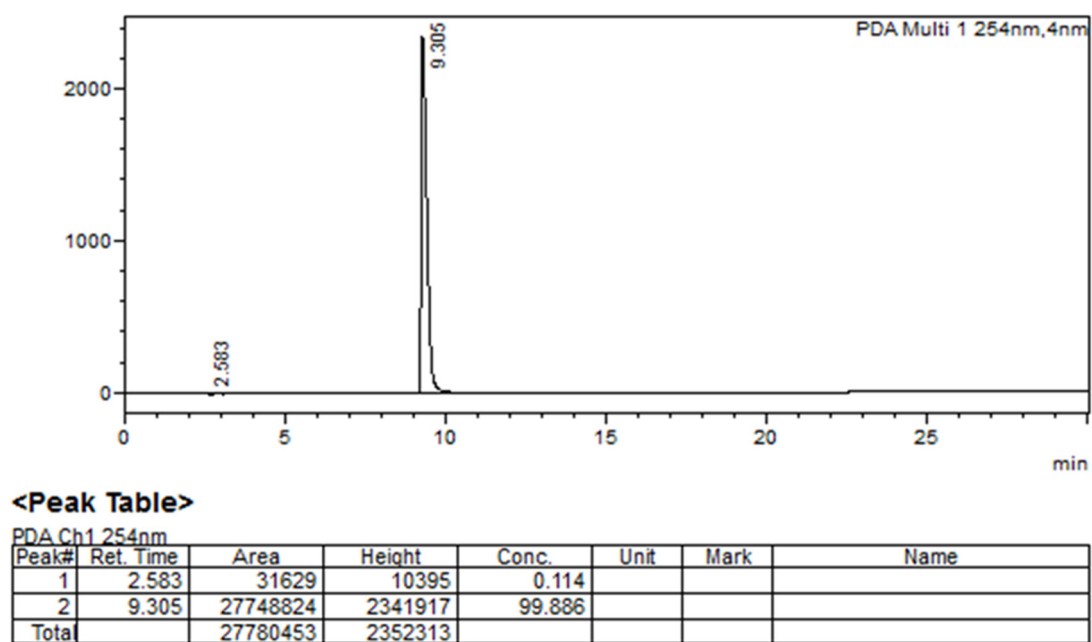

Figure S55. HPLC chromatogram of 31 determined by method B.

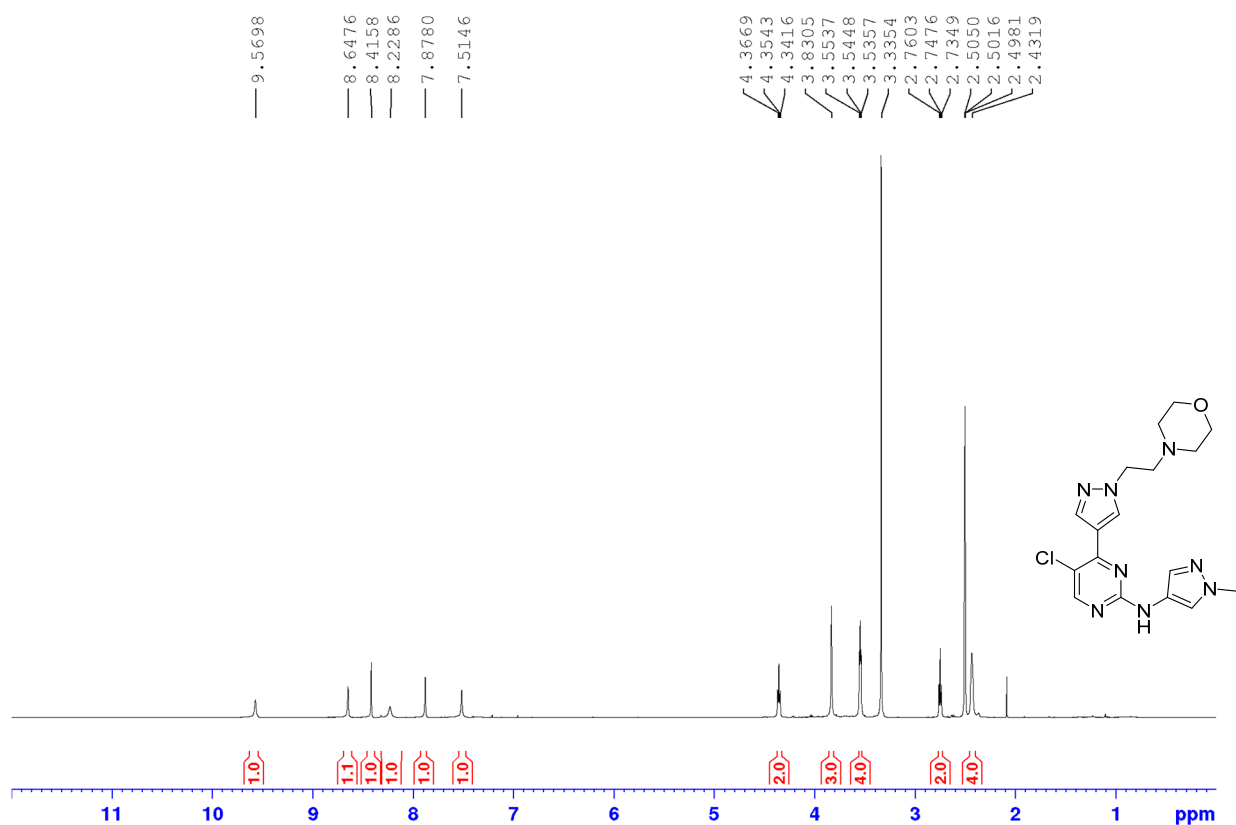

Figure S56.  $^1\text{H}$  NMR spectrum of 32 in  $\text{DMSO}-d_6$  (500 MHz).

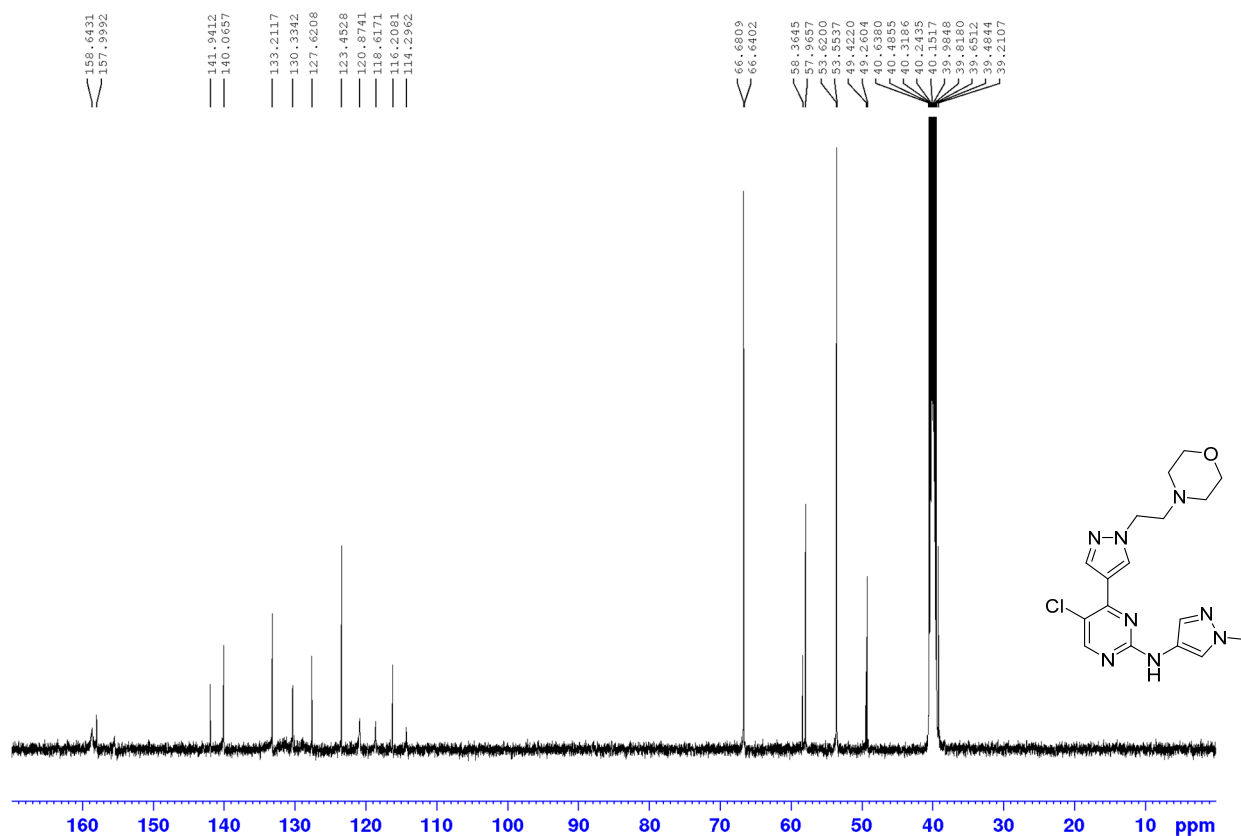

Figure S57. <sup>13</sup>C NMR spectrum of 32 in DMSO-*d*<sub>6</sub> (125 MHz).

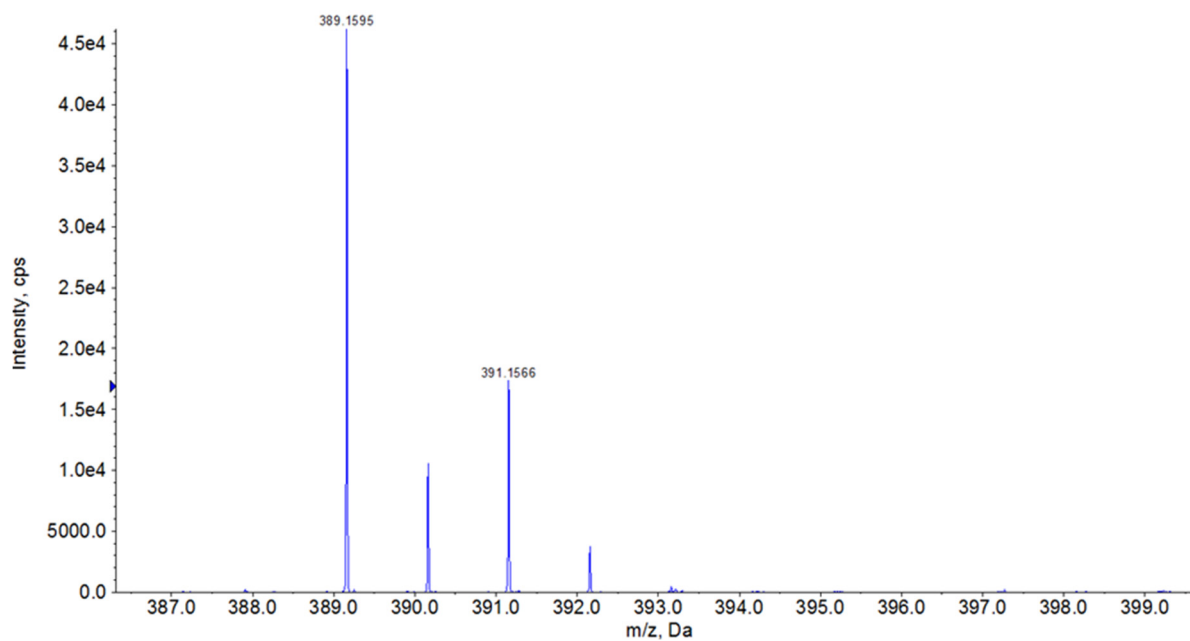

Figure S58. HRMS of 32.

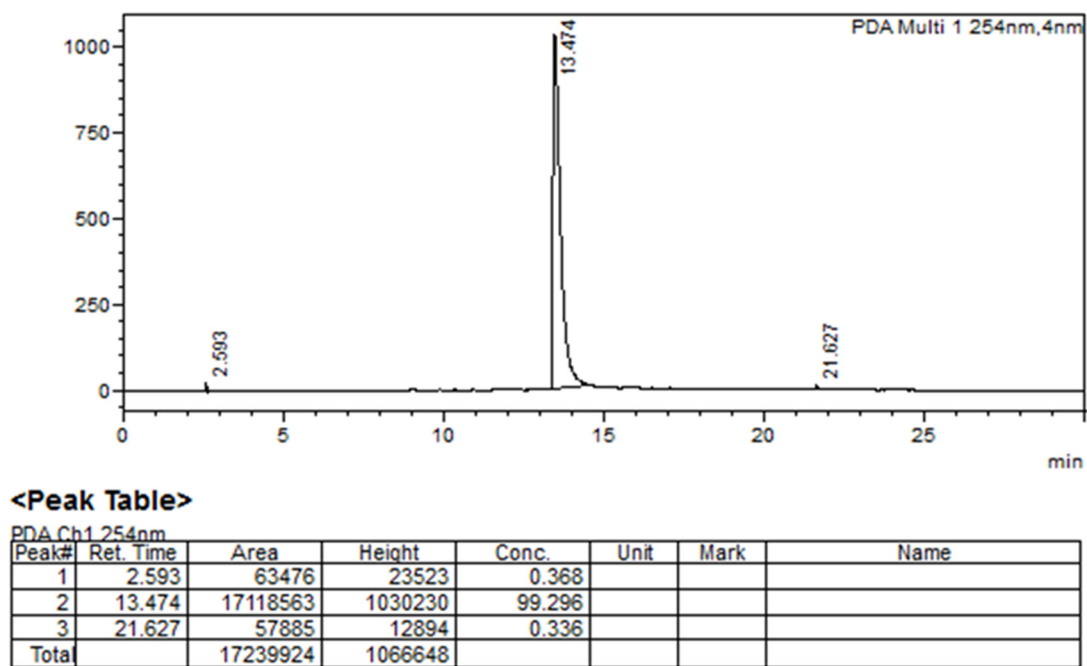

Figure S59. HPLC chromatogram of 32 determined by method A.

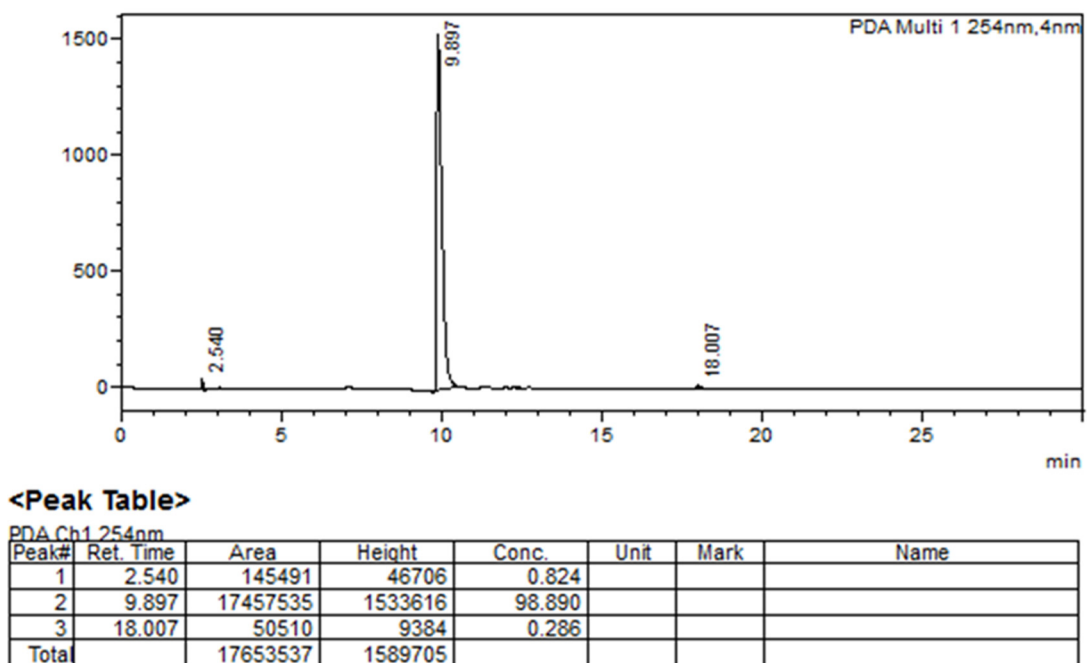

Figure S60. HPLC chromatogram of 32 determined by method B.

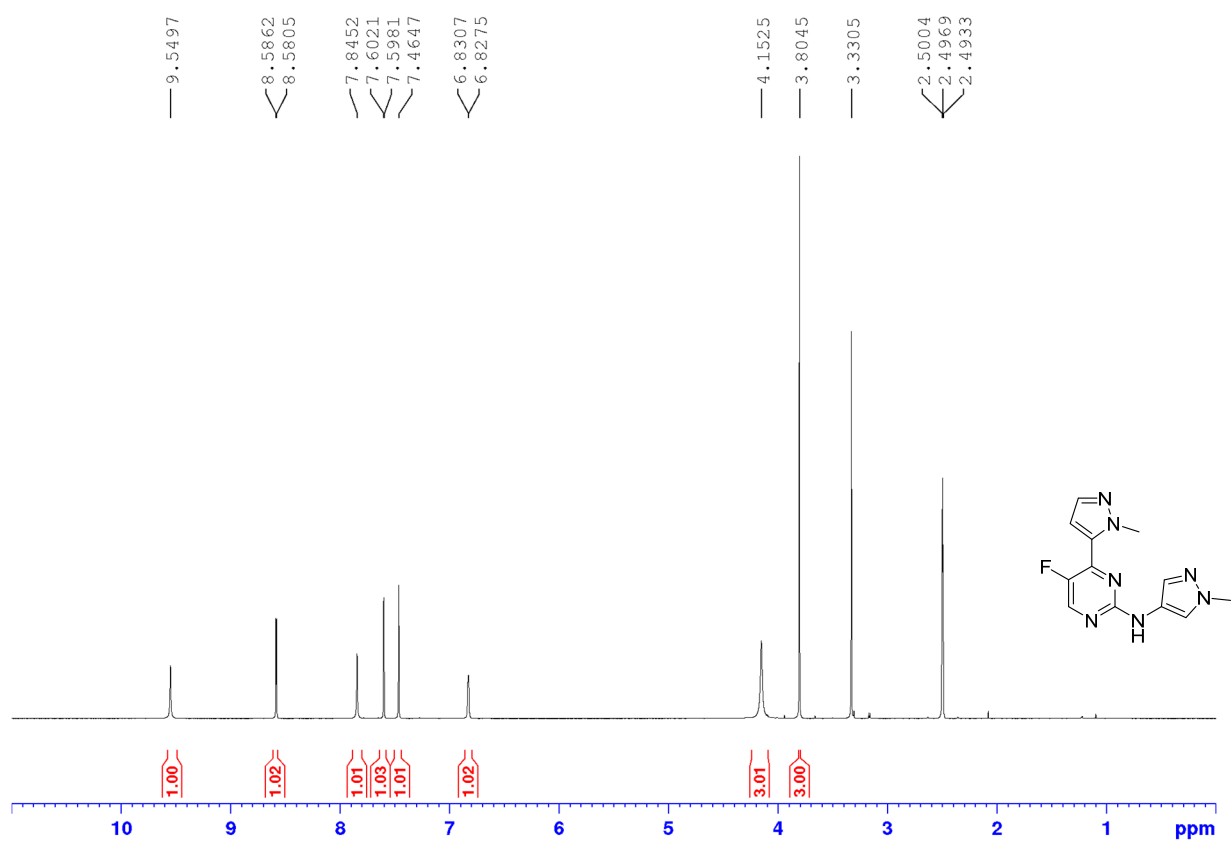

Figure S61. <sup>1</sup>H NMR spectrum of 35 in DMSO-*d*<sub>6</sub> (500 MHz).

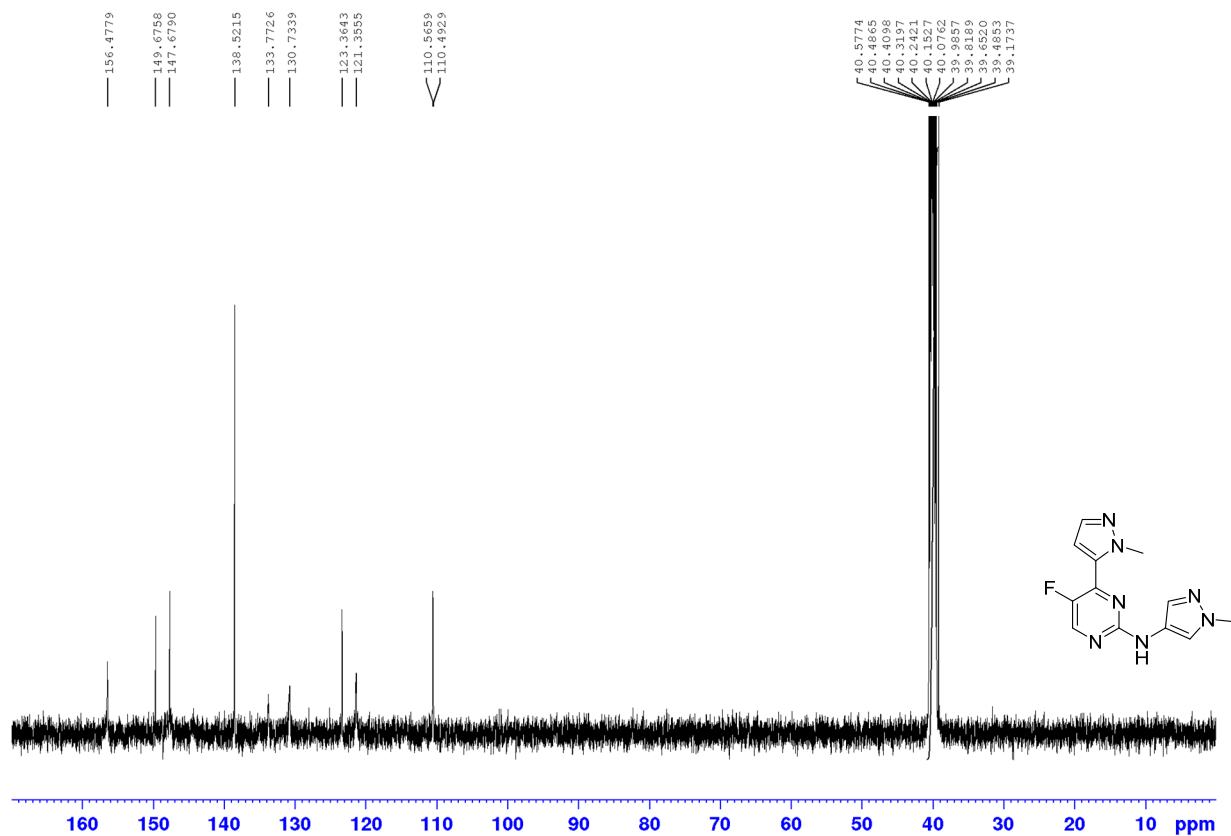

Figure S62. <sup>13</sup>C NMR spectrum of 35 in DMSO-*d*<sub>6</sub> (125 MHz).

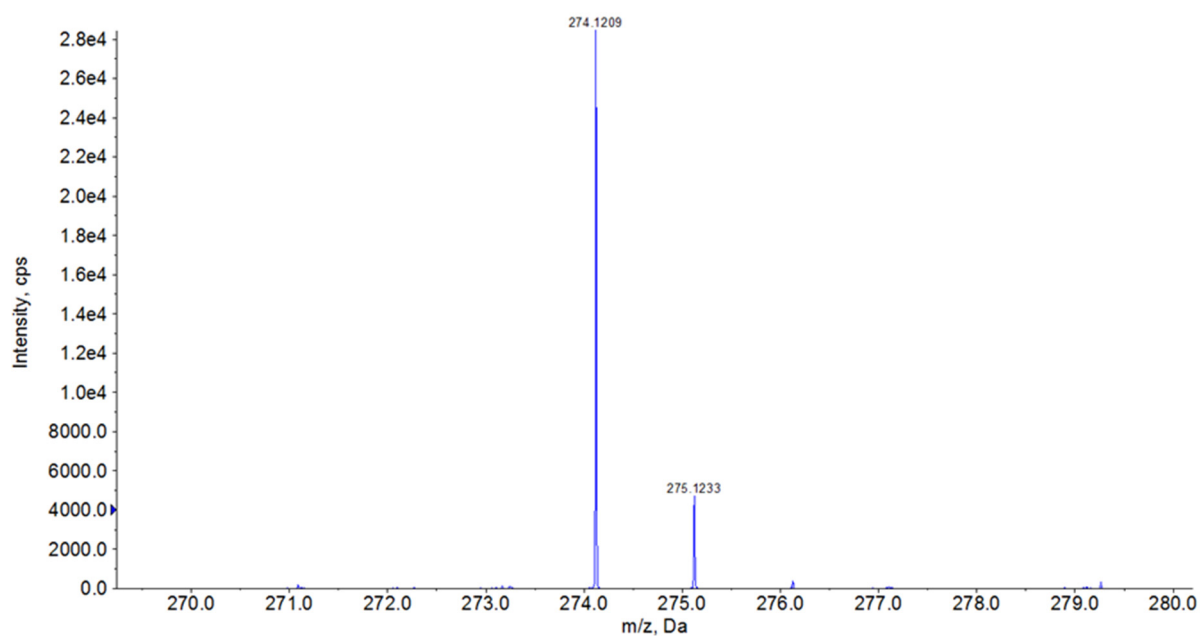

Figure S63. HRMS of 35.

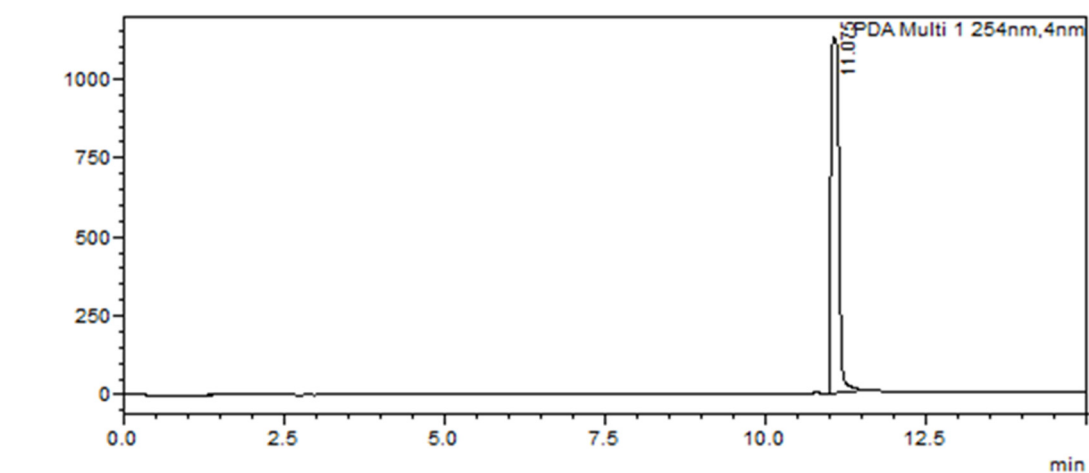

<Peak Table>

PDA Ch1 254nm

| Peak# | Ret. Time | Area     | Height  | Conc.   | Unit | Mark | Name |
|-------|-----------|----------|---------|---------|------|------|------|
| 1     | 11.075    | 10009115 | 1123706 | 100.000 |      |      |      |
| Total |           | 10009115 | 1123706 |         |      |      |      |

Figure S64. HPLC chromatogram of 35 determined by method A.

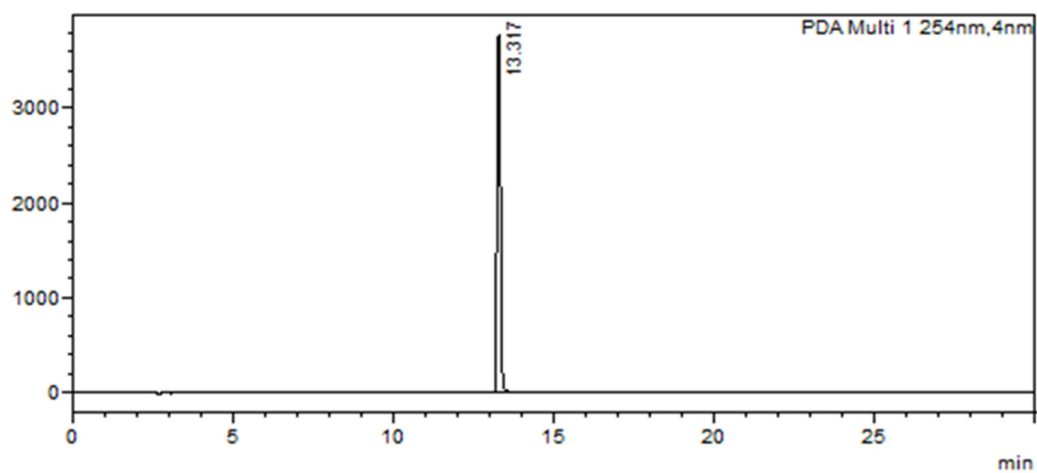

**<Peak Table>**

PDA Ch1 254nm

| Peak# | Ret. Time | Area     | Height  | Conc.   | Unit | Mark | Name |
|-------|-----------|----------|---------|---------|------|------|------|
| 1     | 13.317    | 28404258 | 3763998 | 100.000 |      |      |      |
| Total |           | 28404258 | 3763998 |         |      |      |      |

Figure S65. HPLC chromatogram of 35 determined by method B.
